# Supplementary material
Source: PubMed Central journal article supplement (PMC3812954)
Supplement: NIHMS516429-supplement-1_si_002.pdf [file NIHMS516429-supplement-1_si_002.pdf]

Spectra Images for:

**Dinuclear Zinc-Prophenol-Catalyzed Enantioselective  $\alpha$ -Hydroxyacetate Aldol Reaction  
with Activated Ester Equivalents**

Barry M. Trost,\* David J. Michaelis, Mihai I. Truica  
Department of Chemistry  
Stanford University  
Stanford, CA 94305-5080

**N-Methyl-2-hydroxyacetylimidazole (1d):**

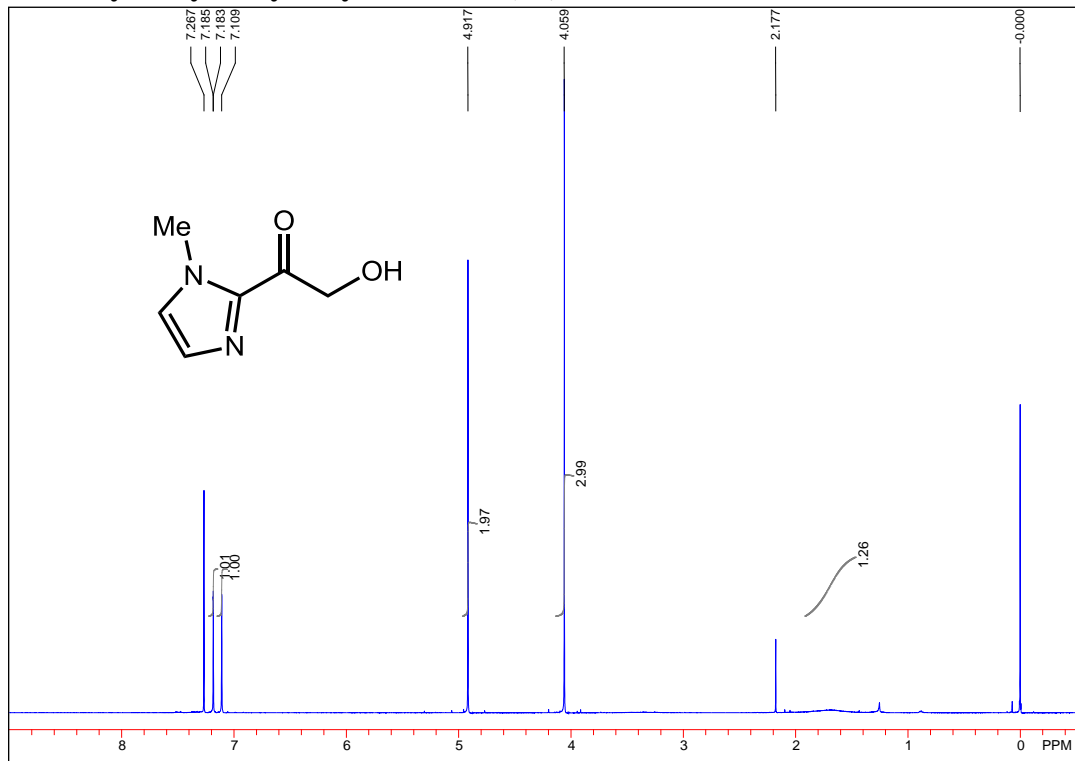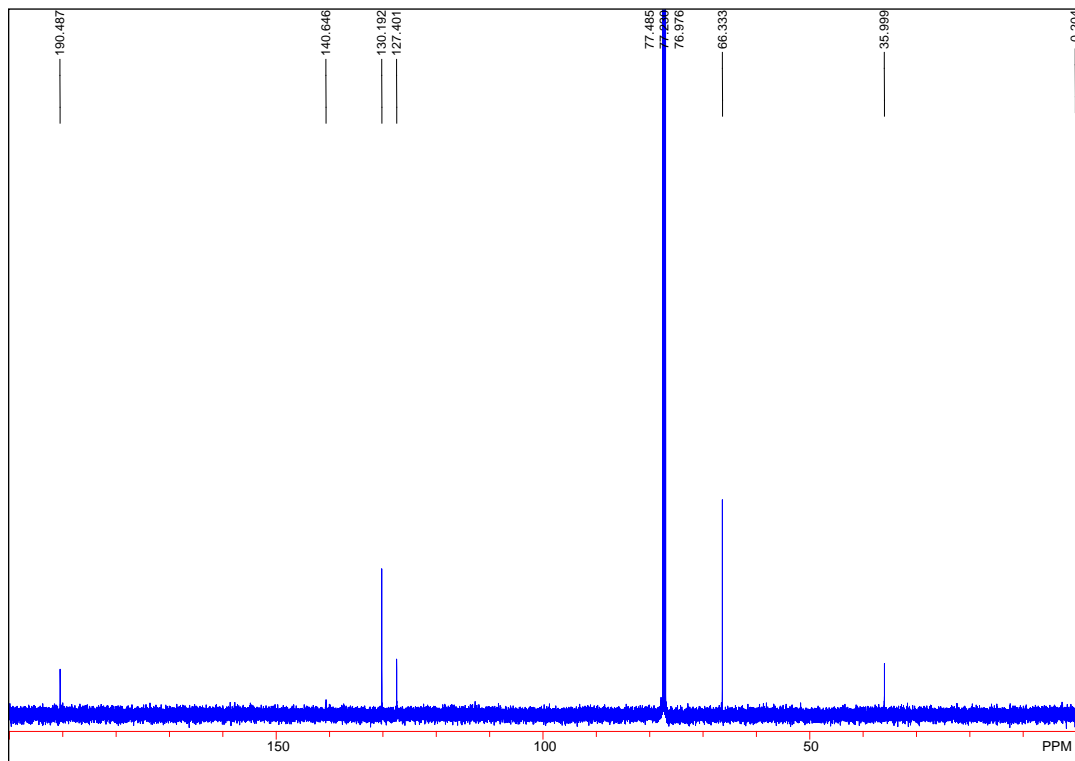

**3-(2-hydroxyacetyl)benzo[d]oxazol-2(3H)-one (1f):**

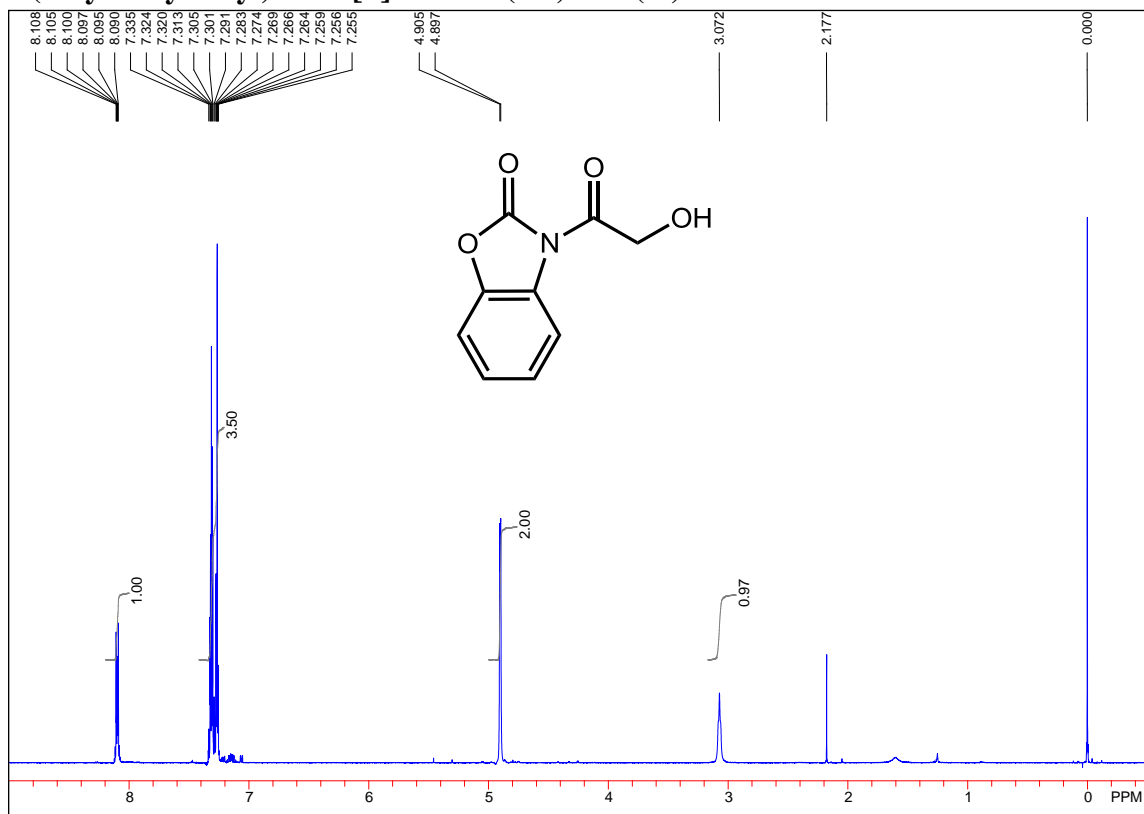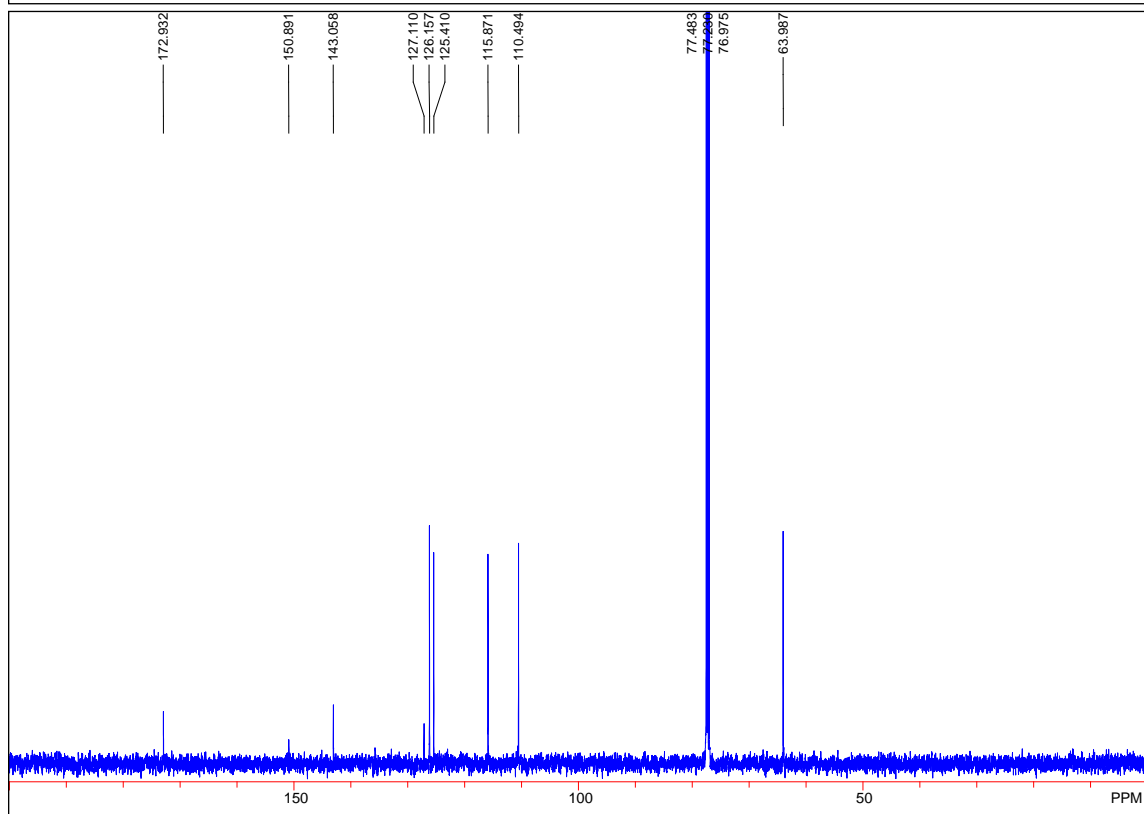

**(2R,3S)-3-cyclohexyl-1-(2-ethyl-1H-pyrrol-1-yl)-2,3-dihydroxypropan-1-one (3c):**

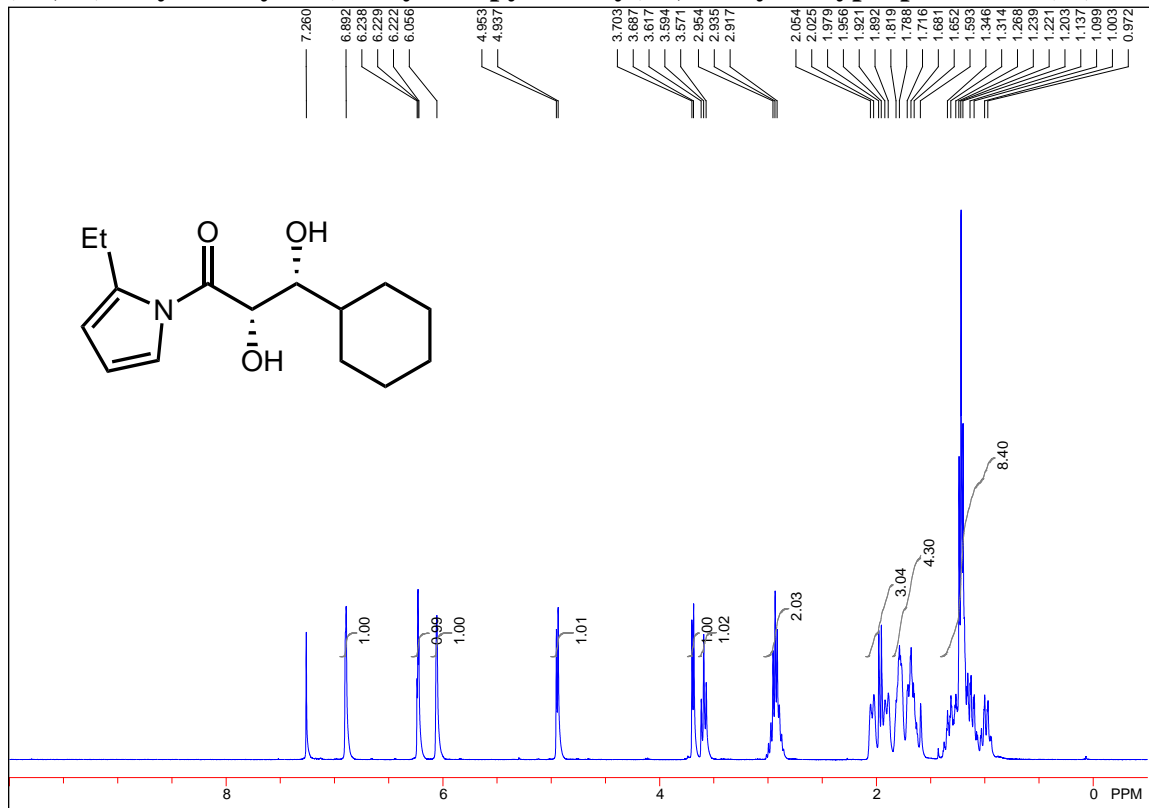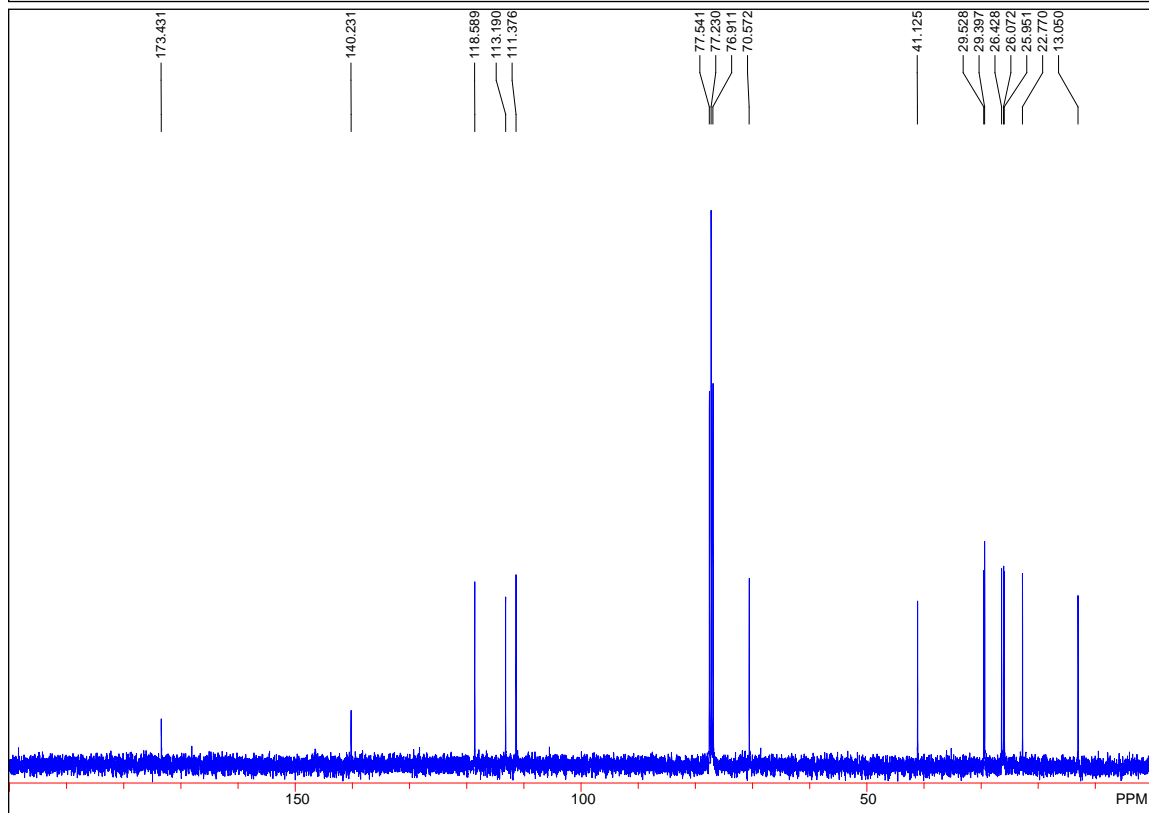

**(2R,3S)-1-(2-ethyl-1H-pyrrol-1-yl)-2,3-dihydroxy-4-methylpentan-1-one (3d):**

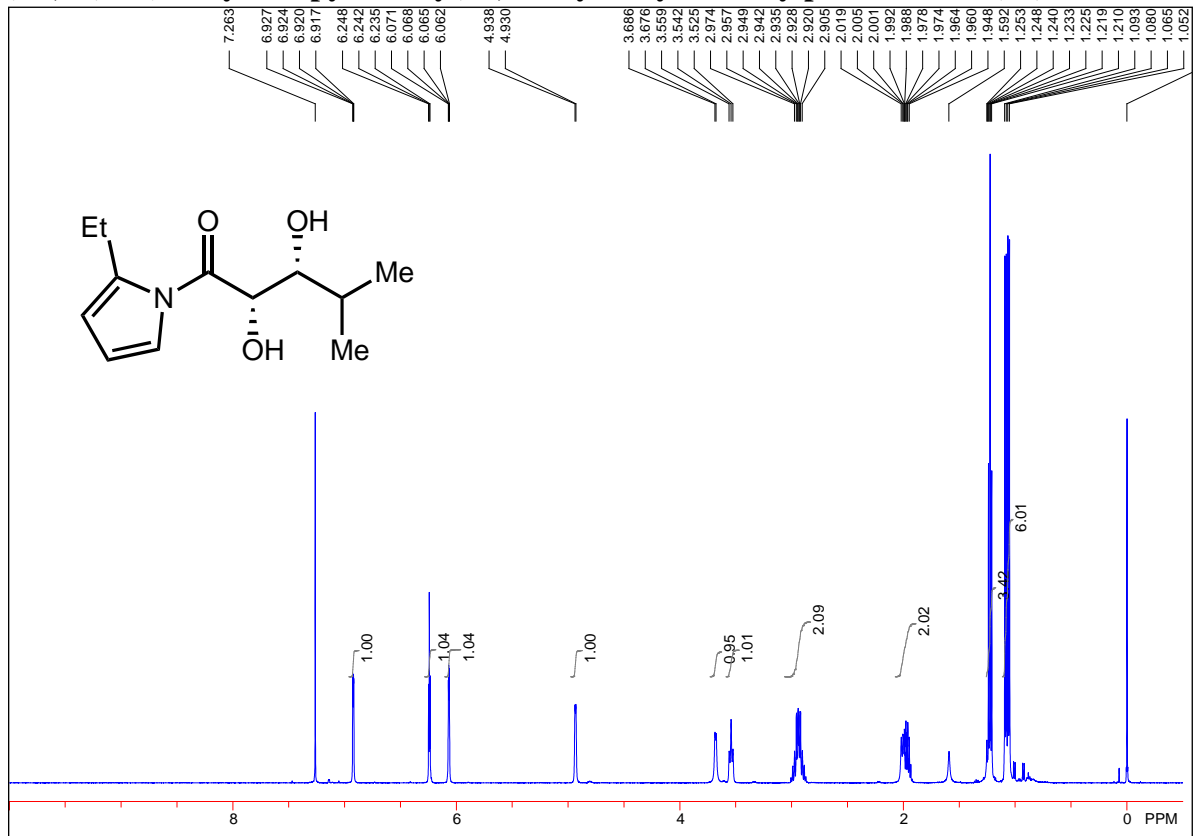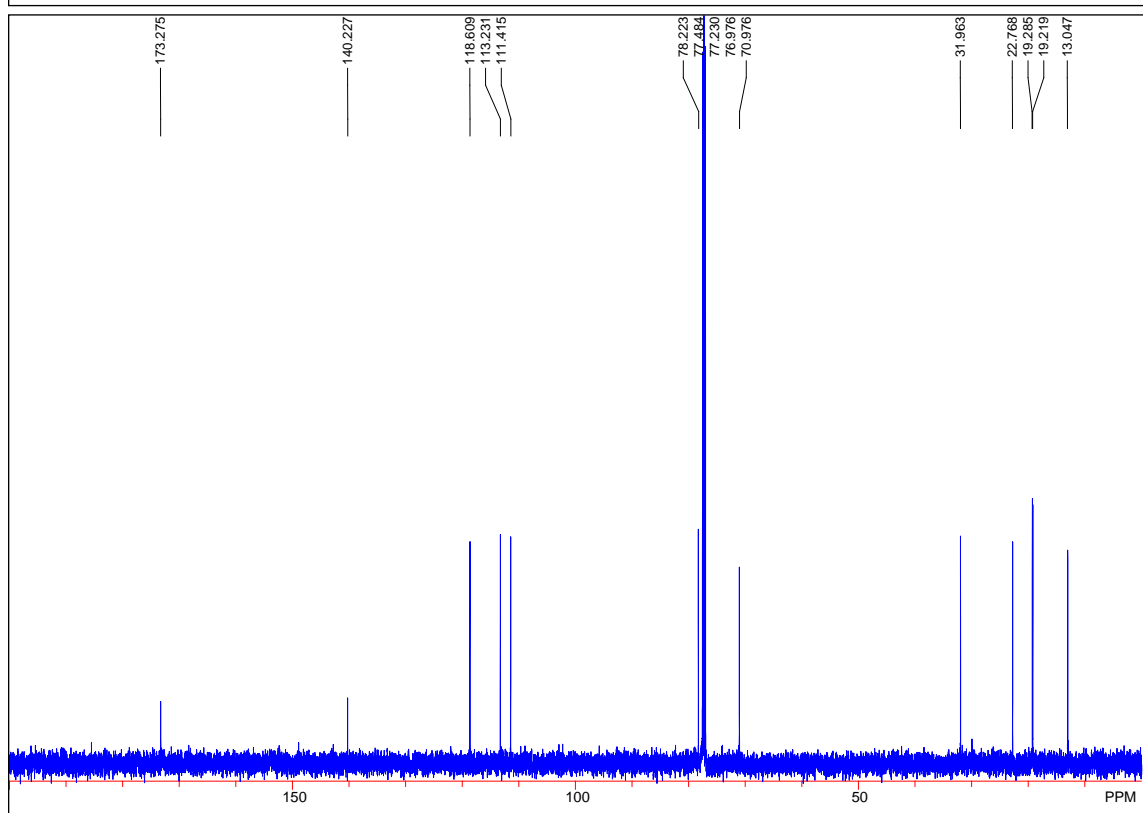

**(2R,3S)-4-ethyl-1-(2-ethyl-1H-pyrrol-1-yl)-2,3-dihydroxyhexan-1-one (3e):**

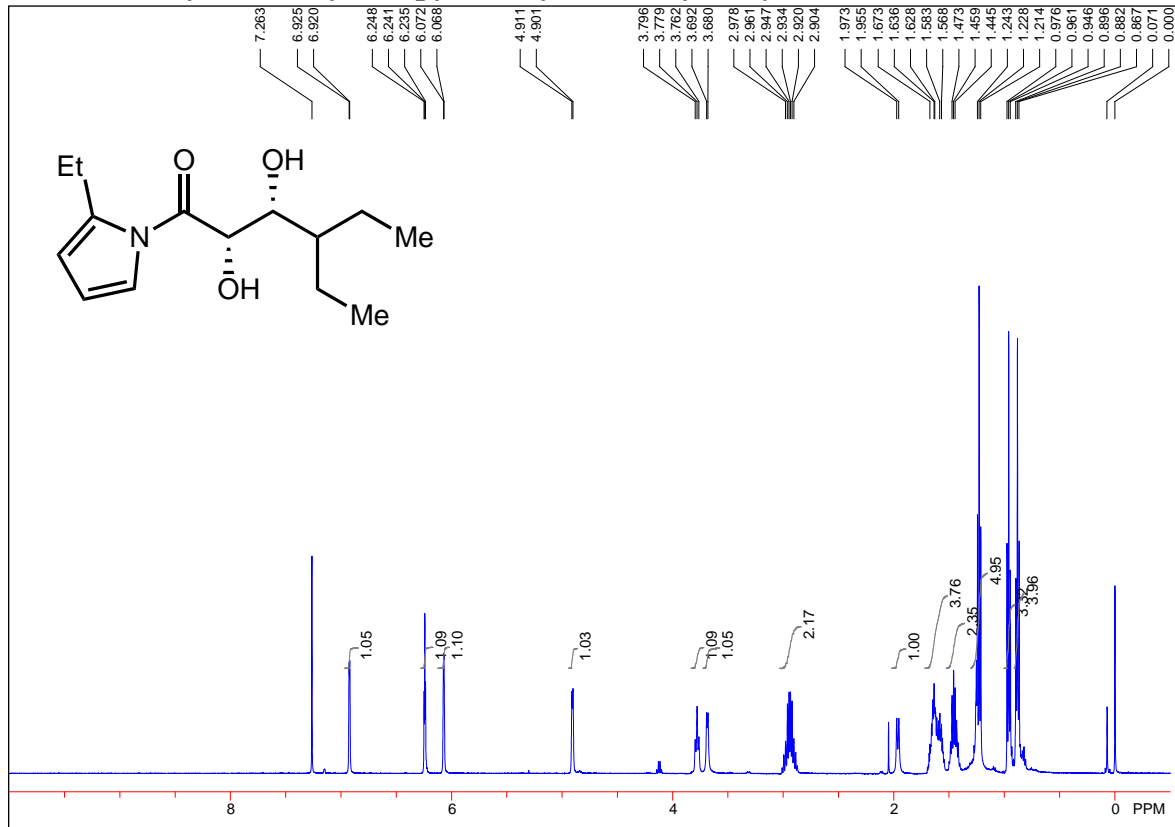

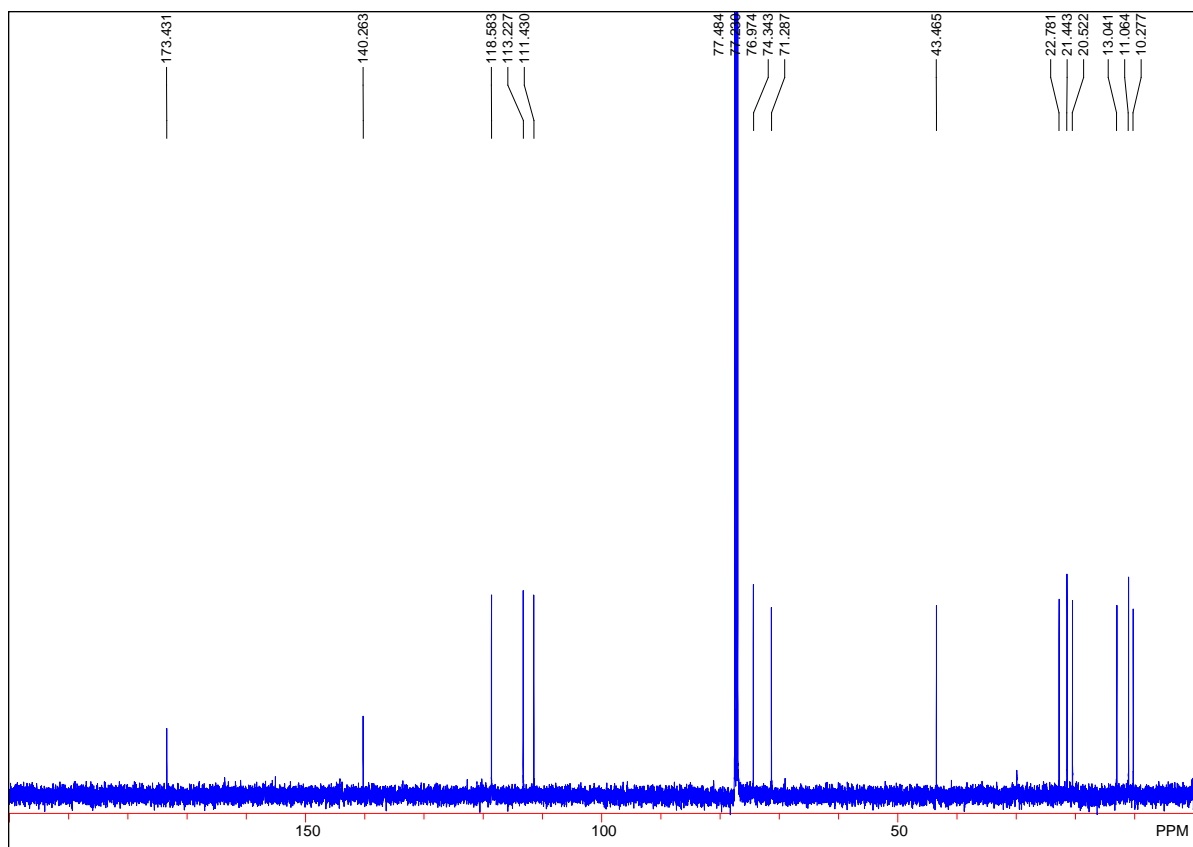

**(2R,3S)-1-(2-ethyl-1H-pyrrol-1-yl)-2,3-dihydroxy-5-methylhexan-1-one (3f):**

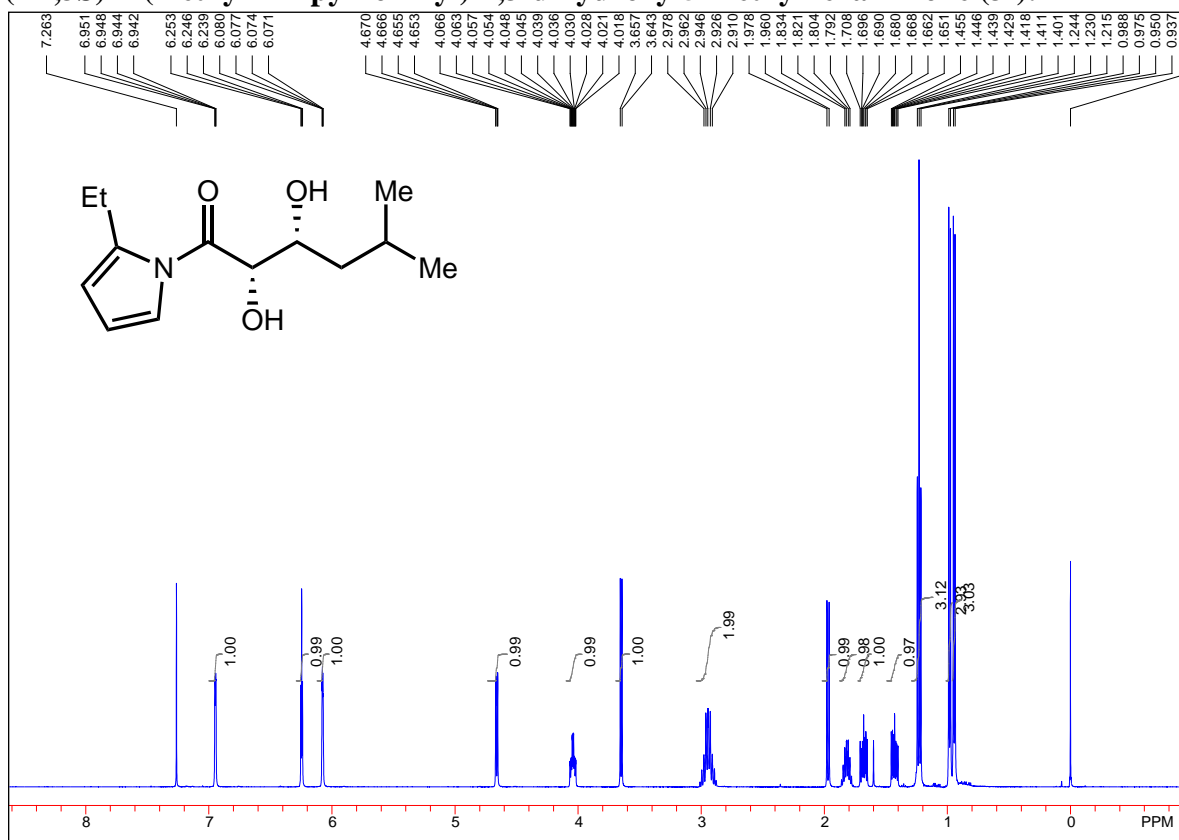

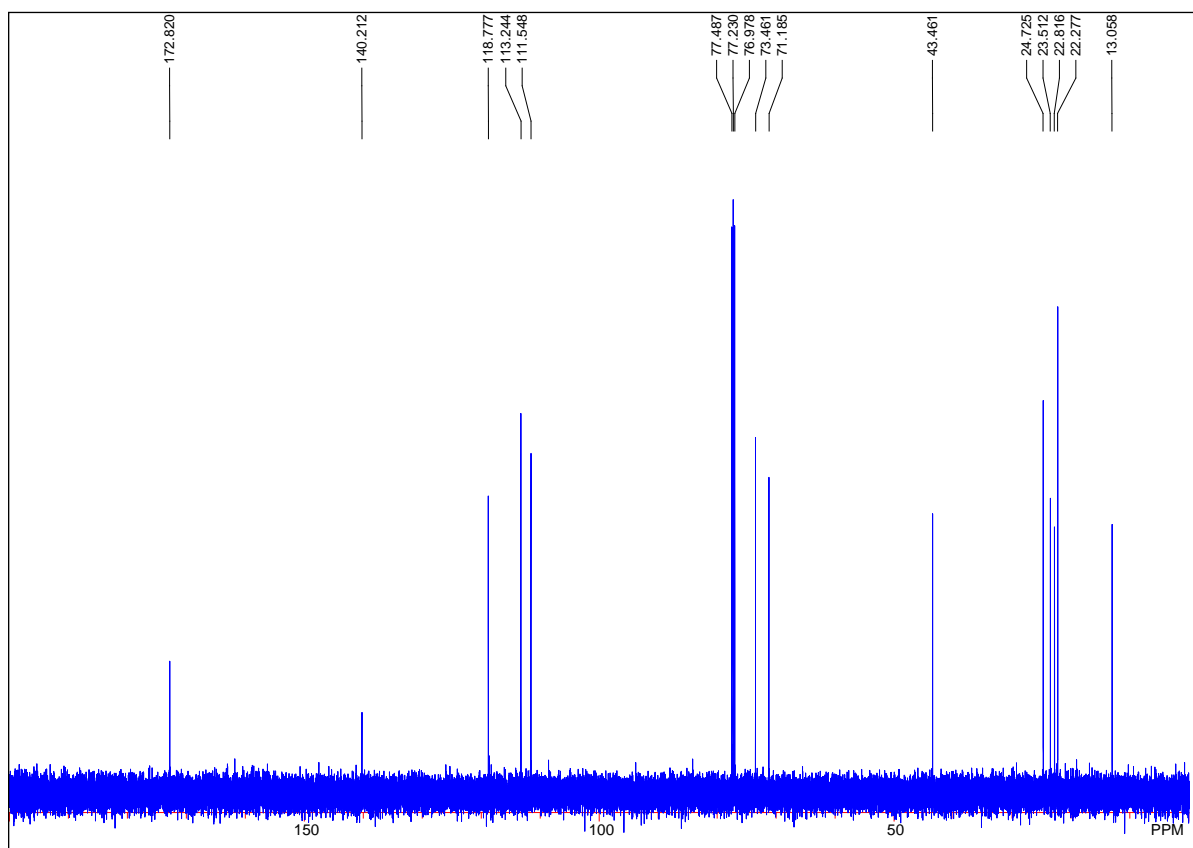

**(2R,3S)-1-(2-ethyl-1H-pyrrol-1-yl)-2,3-dihydroxyheptan-1-one (3g):**



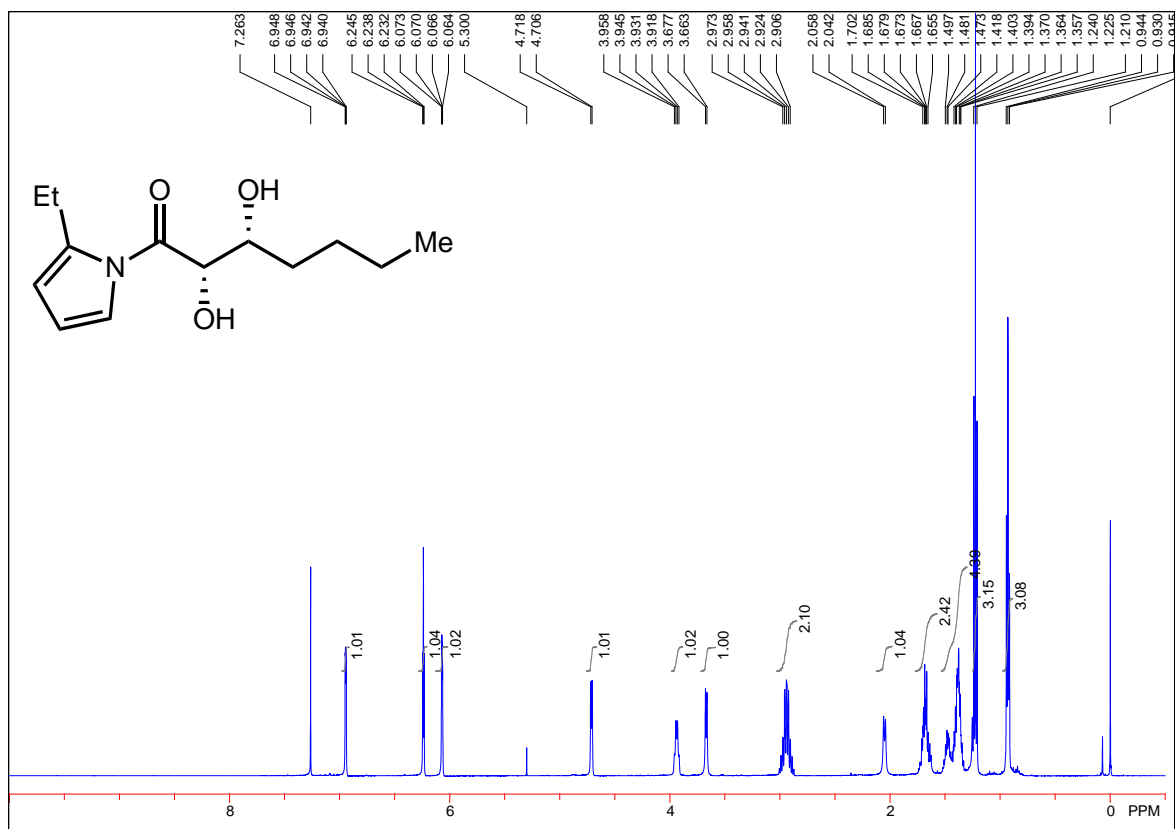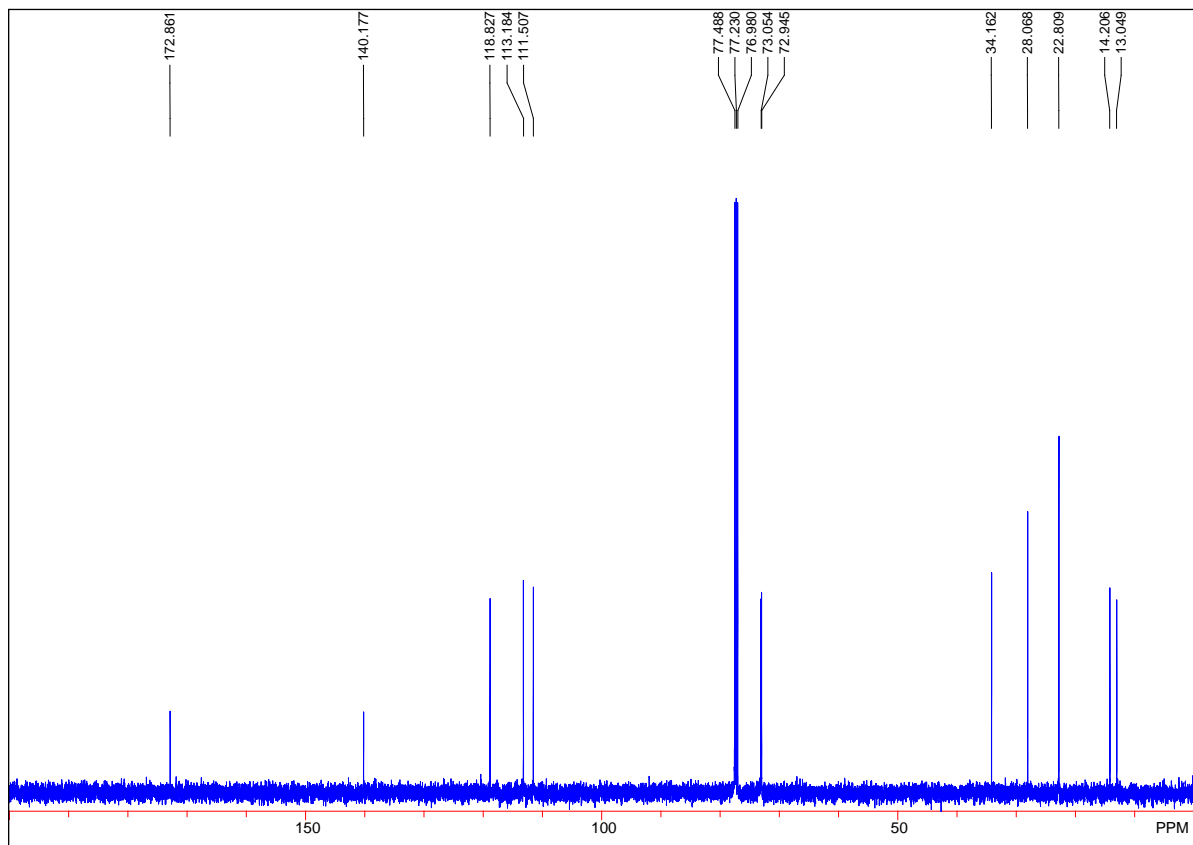

**(2R,3S)-1-(2-ethyl-1H-pyrrol-1-yl)-2,3-dihydroxy-5-phenylpentan-1-one (3h):**

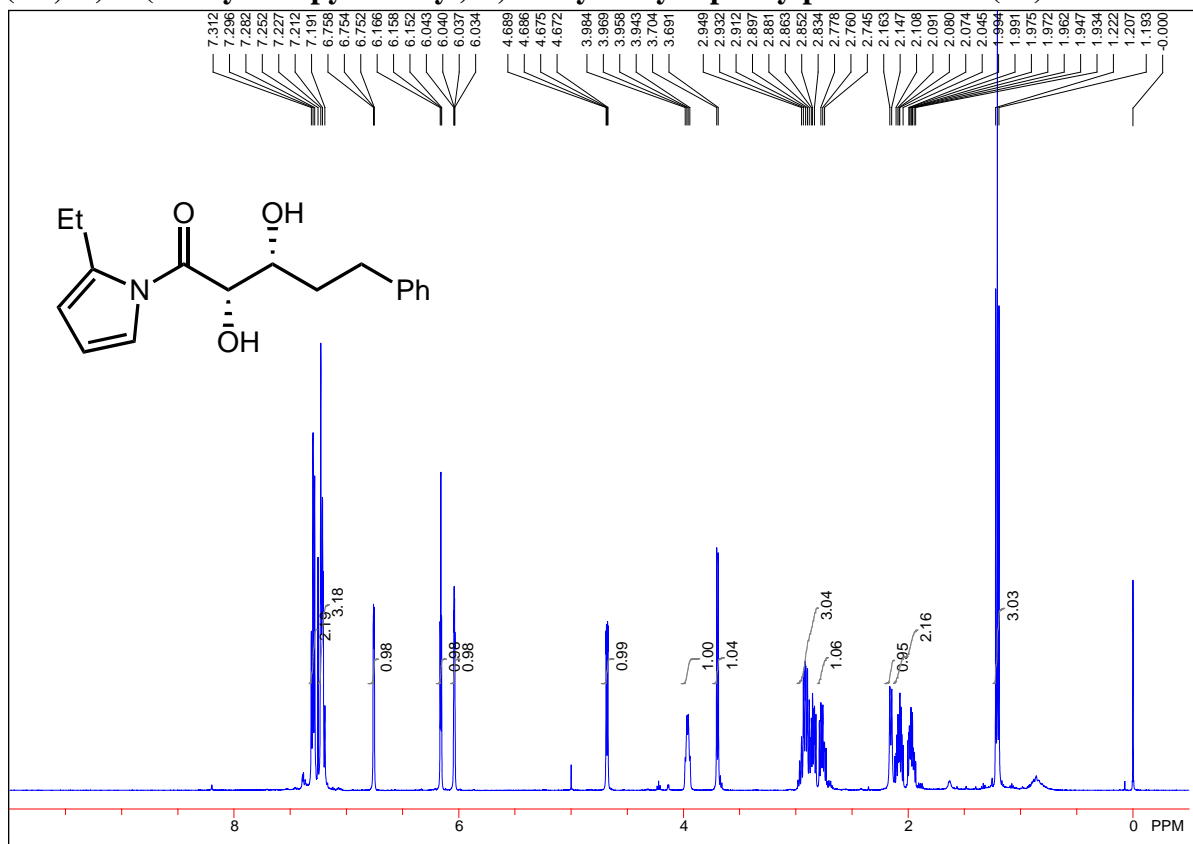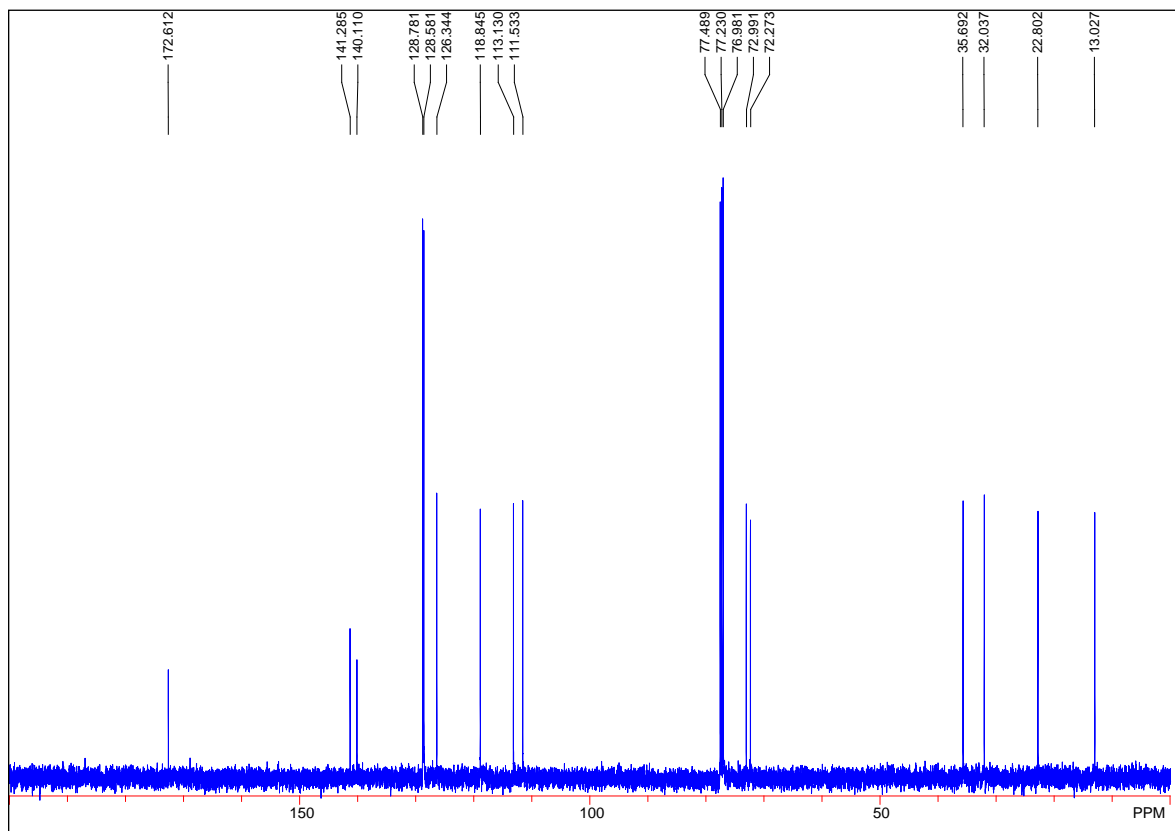

**(2R,3S)-1-(2-ethyl-1H-pyrrol-1-yl)-2,3-dihydroxy-4,4-dimethylpentan-1-one (3j):**

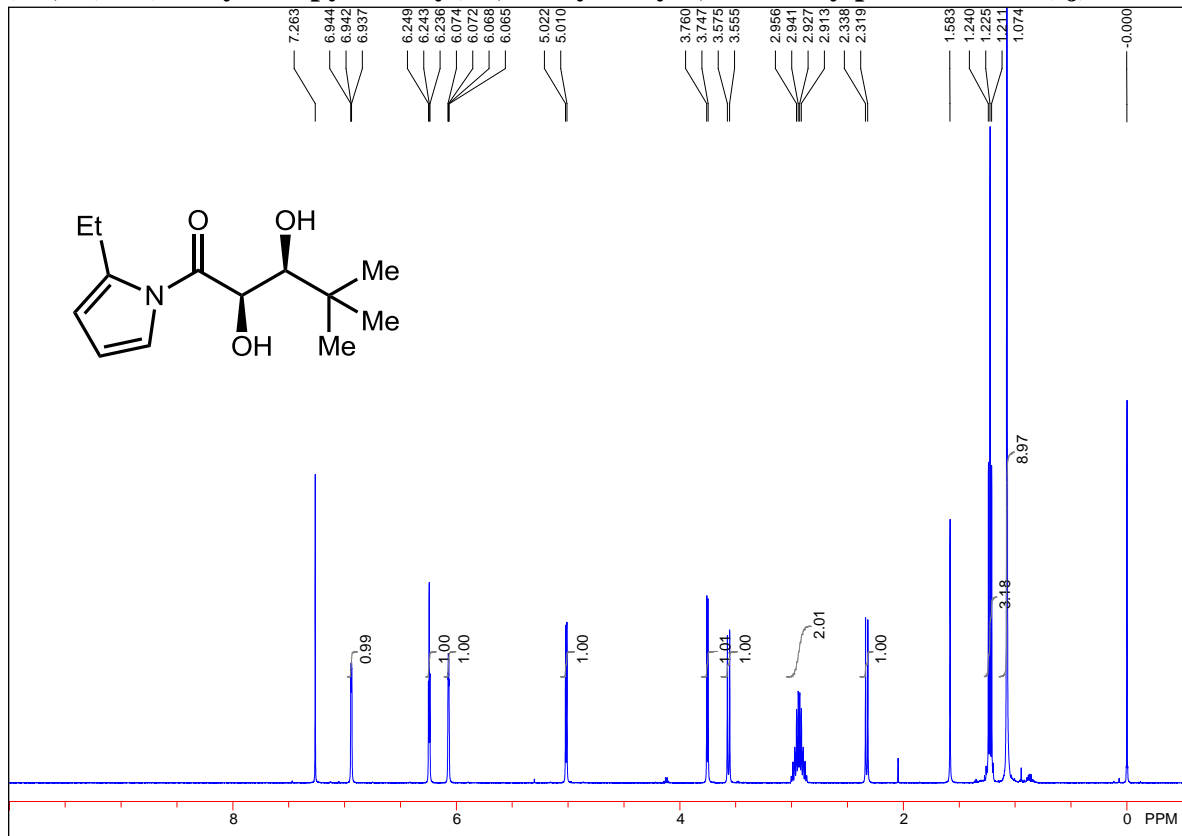

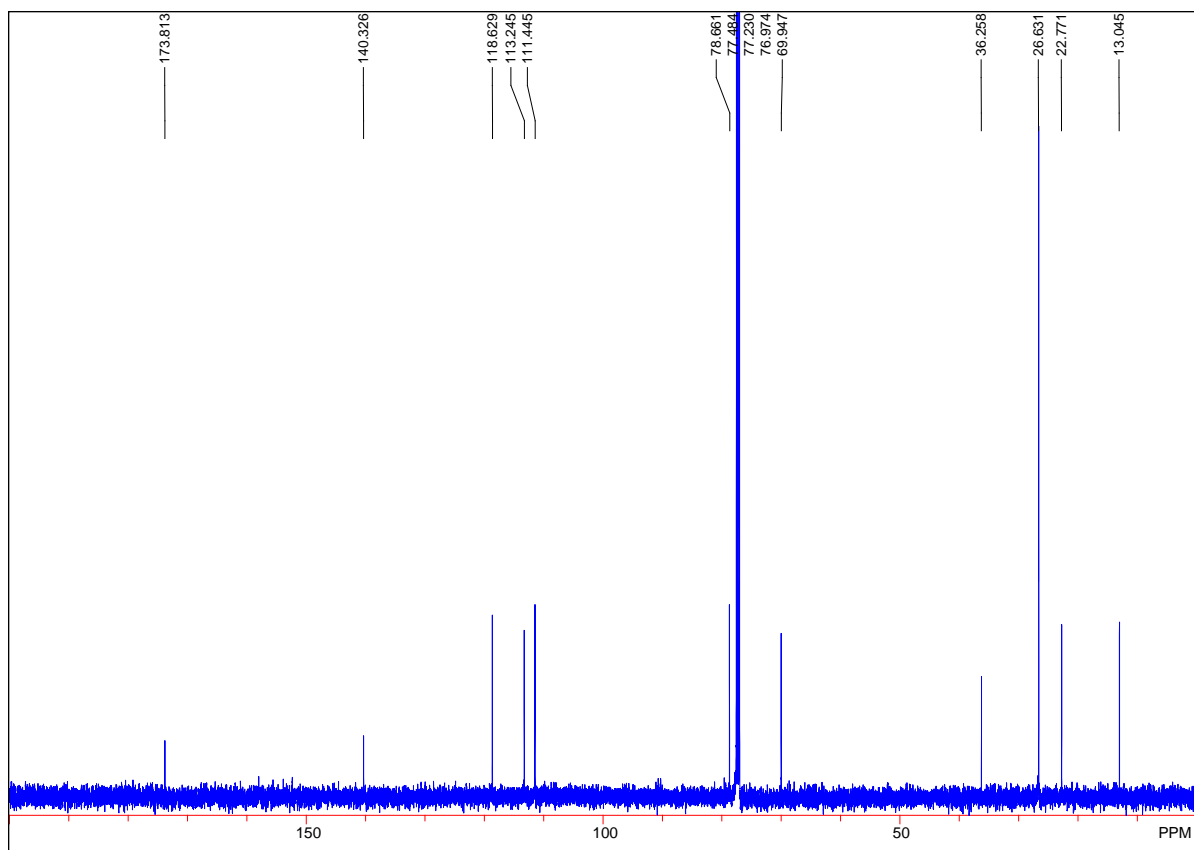

**(2R,3R)-4,4-diethoxy-1-(2-ethyl-1H-pyrrol-1-yl)-2,3-dihydroxyhept-6-en-1-one (3k):**

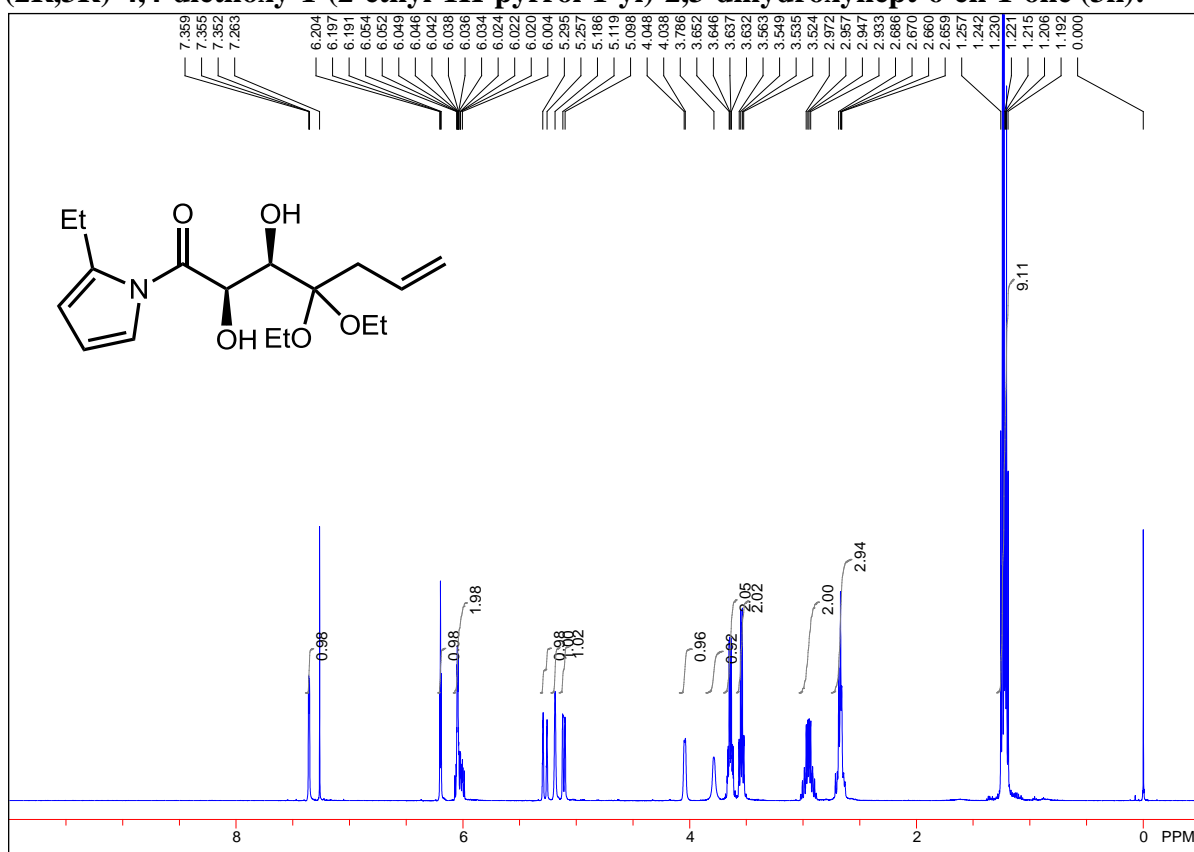

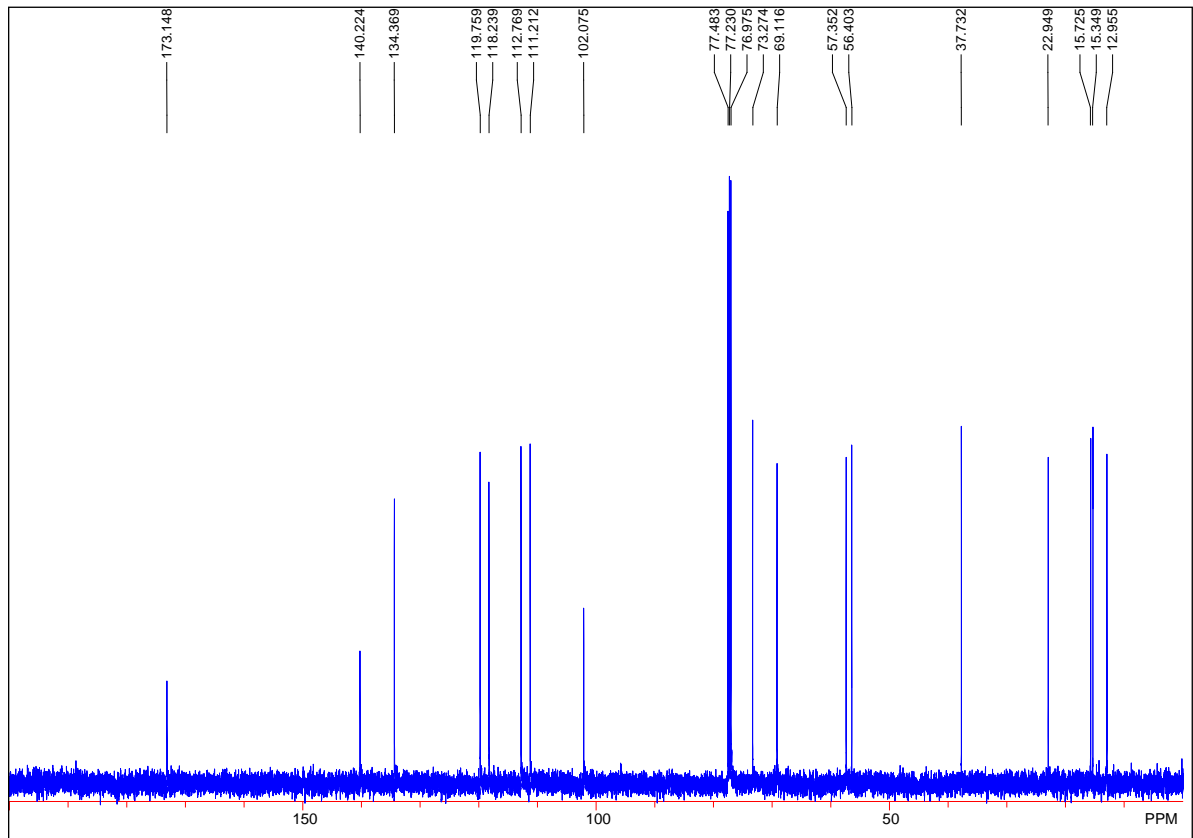

**(2R,3S)-5-((tert-butyl dimethylsilyl)oxy)-1-(2-ethyl-1H-pyrrol-1-yl)-2,3-dihydroxy-4,4-dimethylpentan-1-one (3l):**

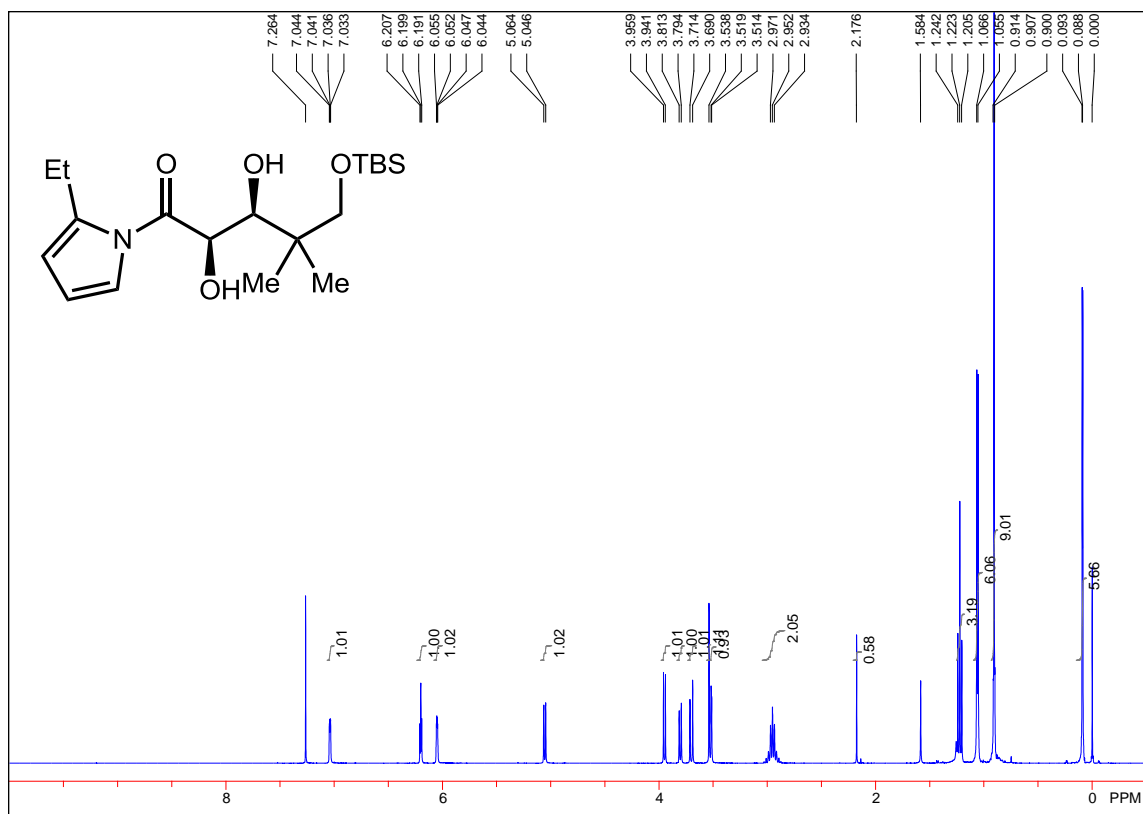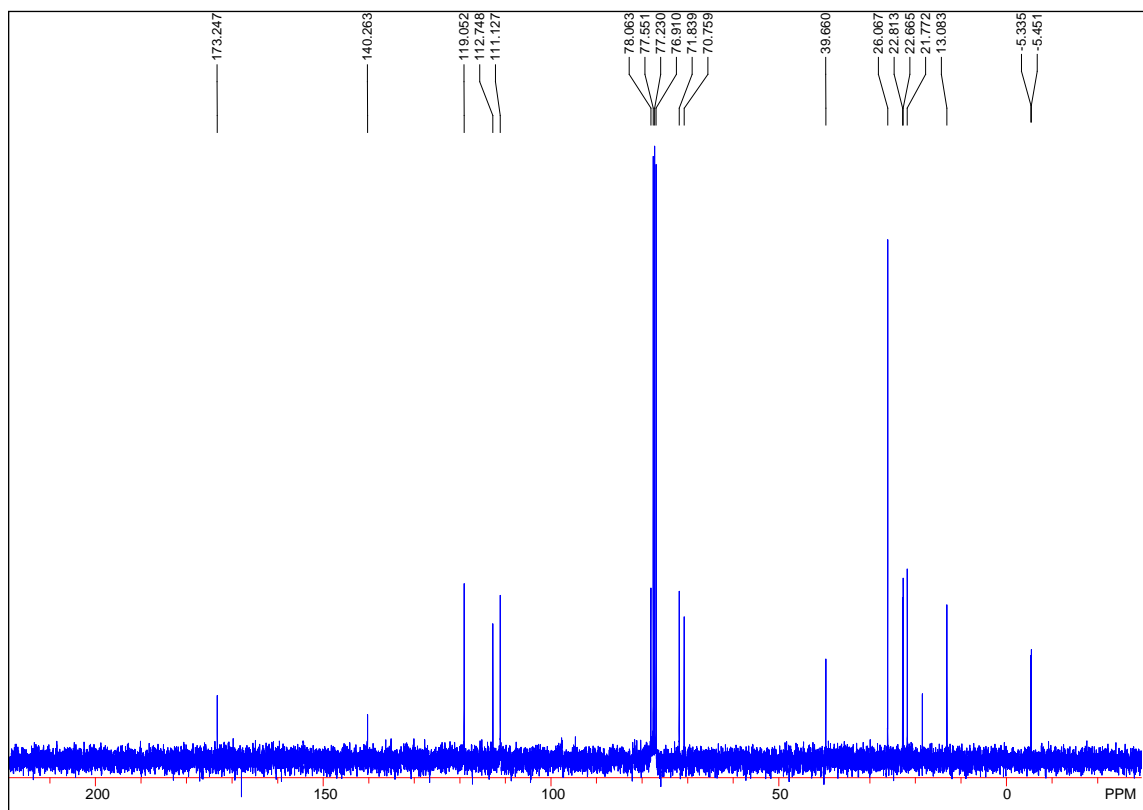

(**2R,3S**)-1-(2-ethyl-1H-pyrrol-1-yl)-2,3-dihydroxy-3-phenylpropan-1-one (**3m**):

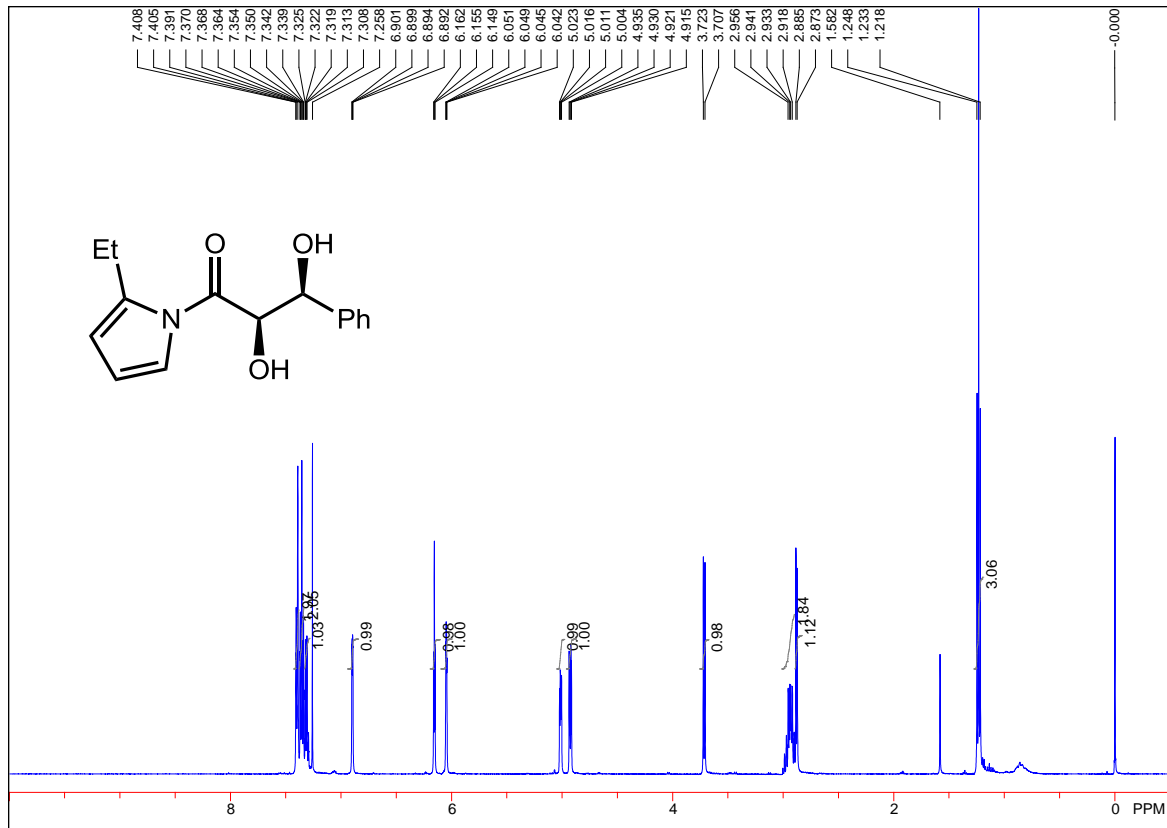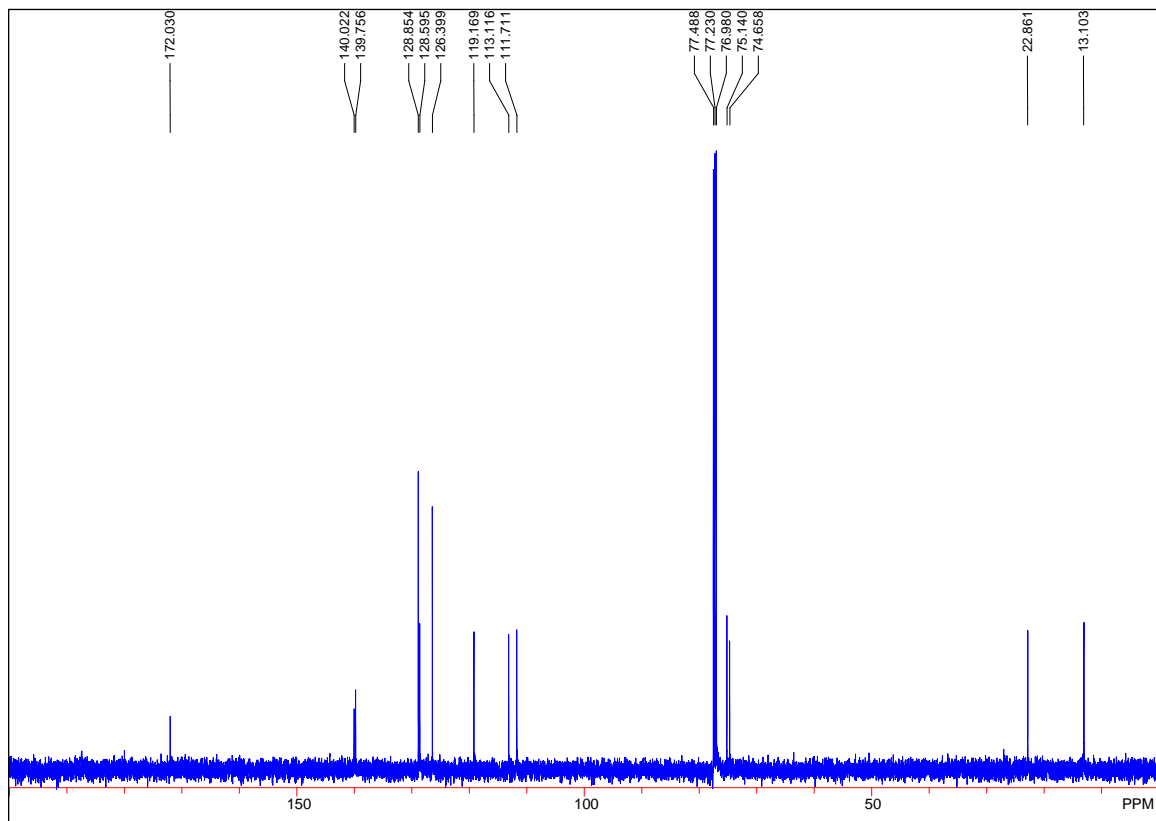

**(2R,3S)-3-(4-chlorophenyl)-1-(2-ethyl-1H-pyrrol-1-yl)-2,3-dihydroxypropan-1-one  
(3n):**

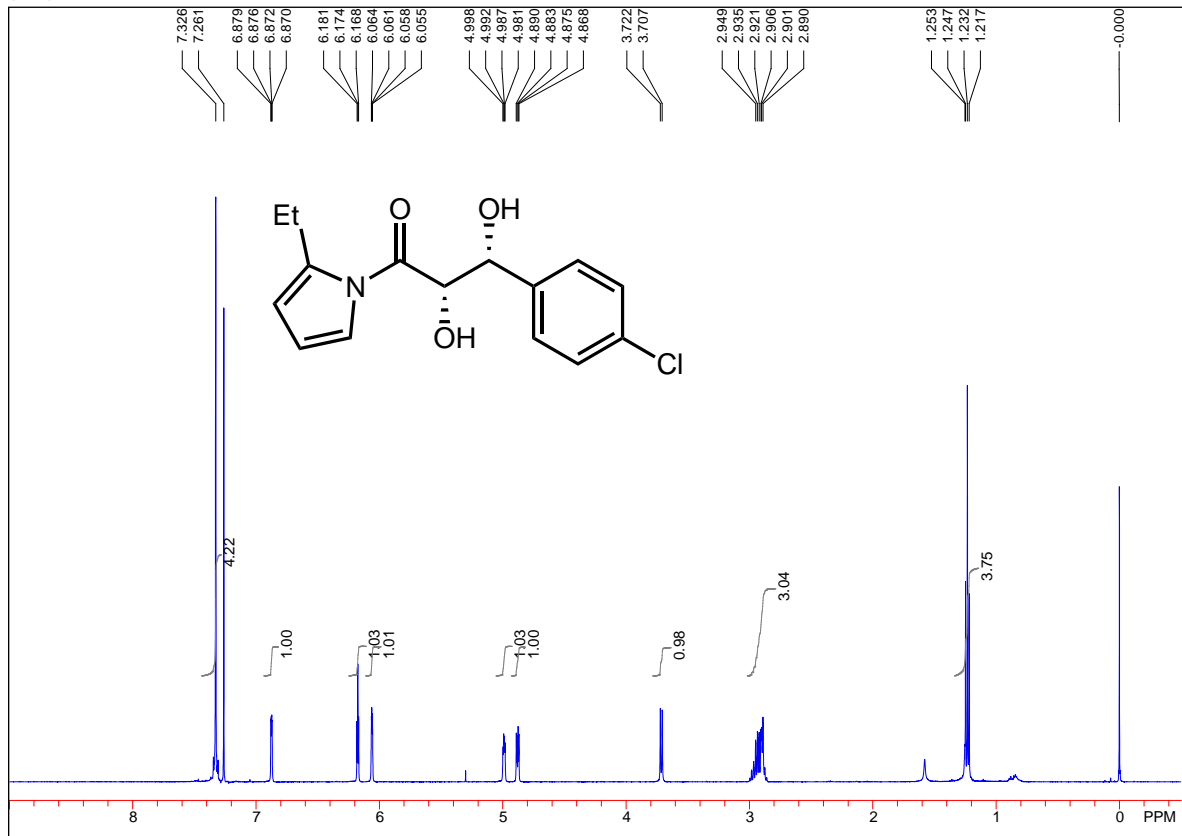



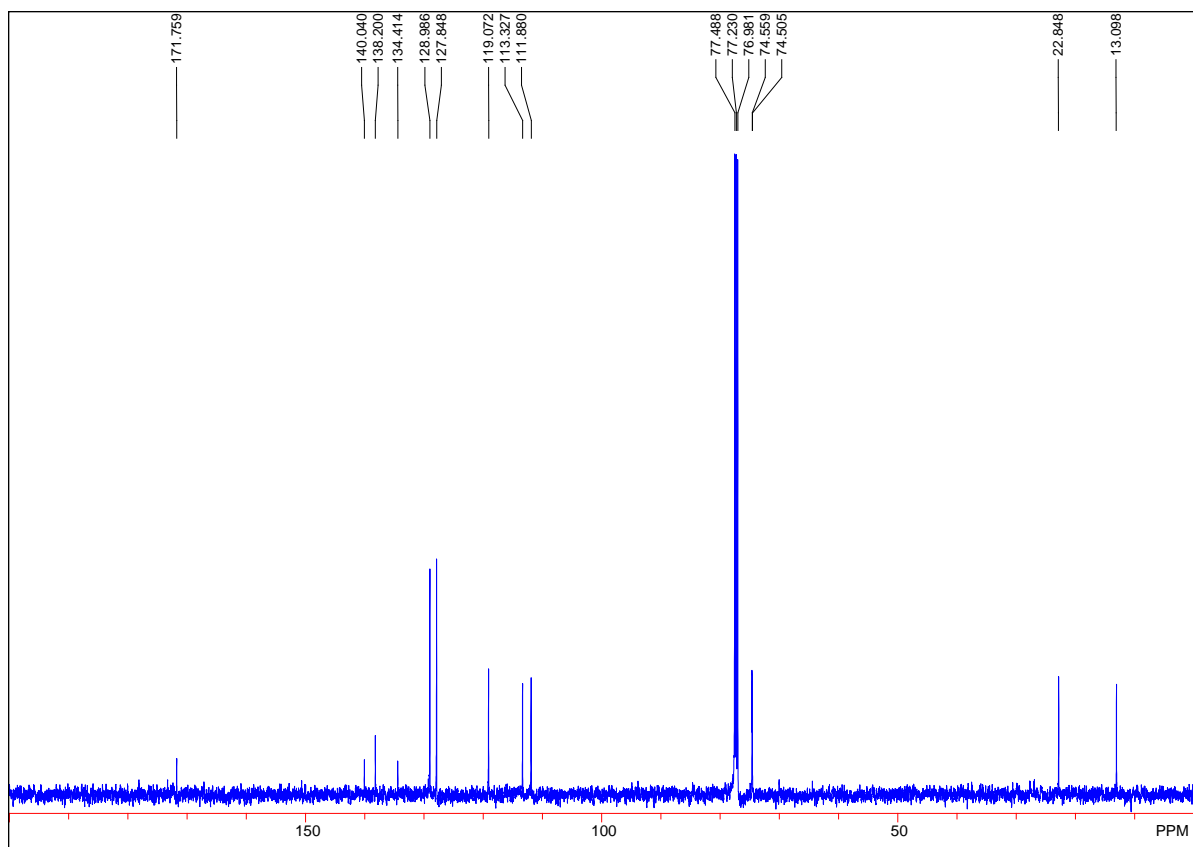

**(2R,3S,E)-1-(2-ethyl-1H-pyrrol-1-yl)-2,3-dihydroxy-5-phenylpent-4-en-1-one (3o):**

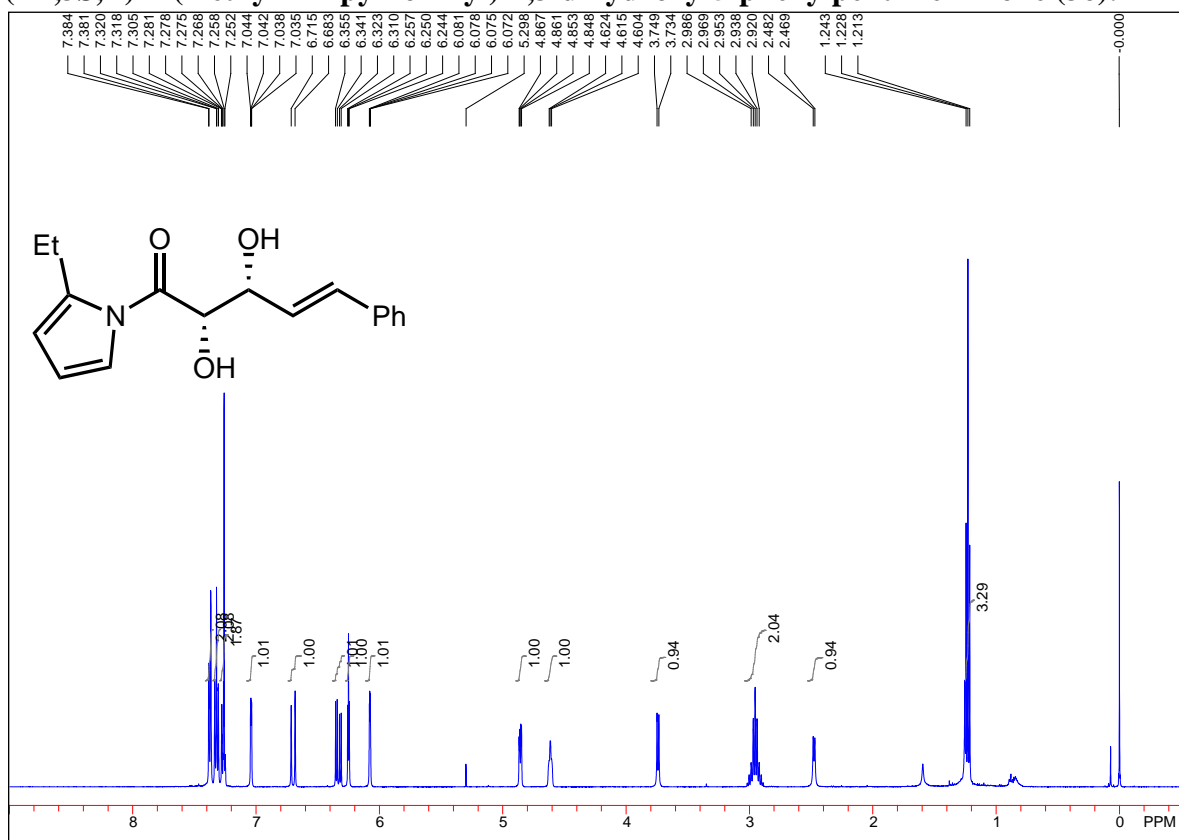

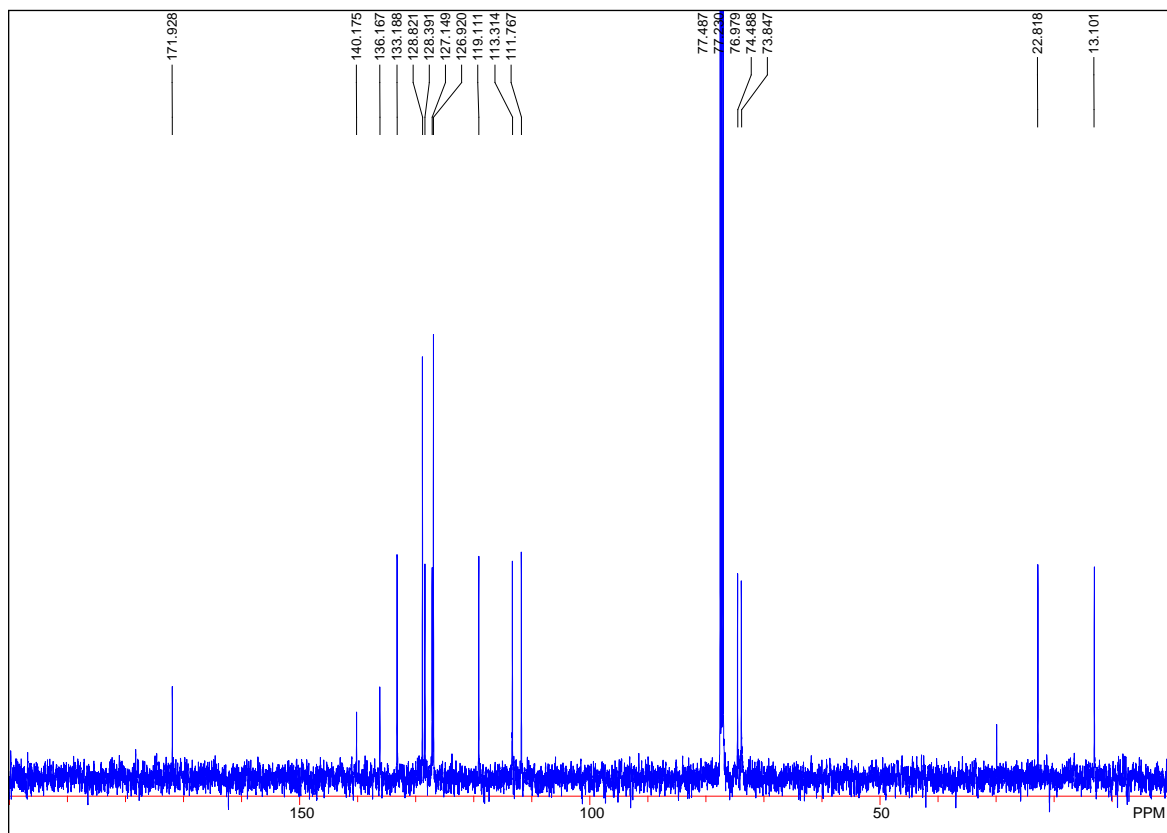

**(2R,3S)-methyl 3-cyclohexyl-2,3-dihydroxypropanoate (5a):**

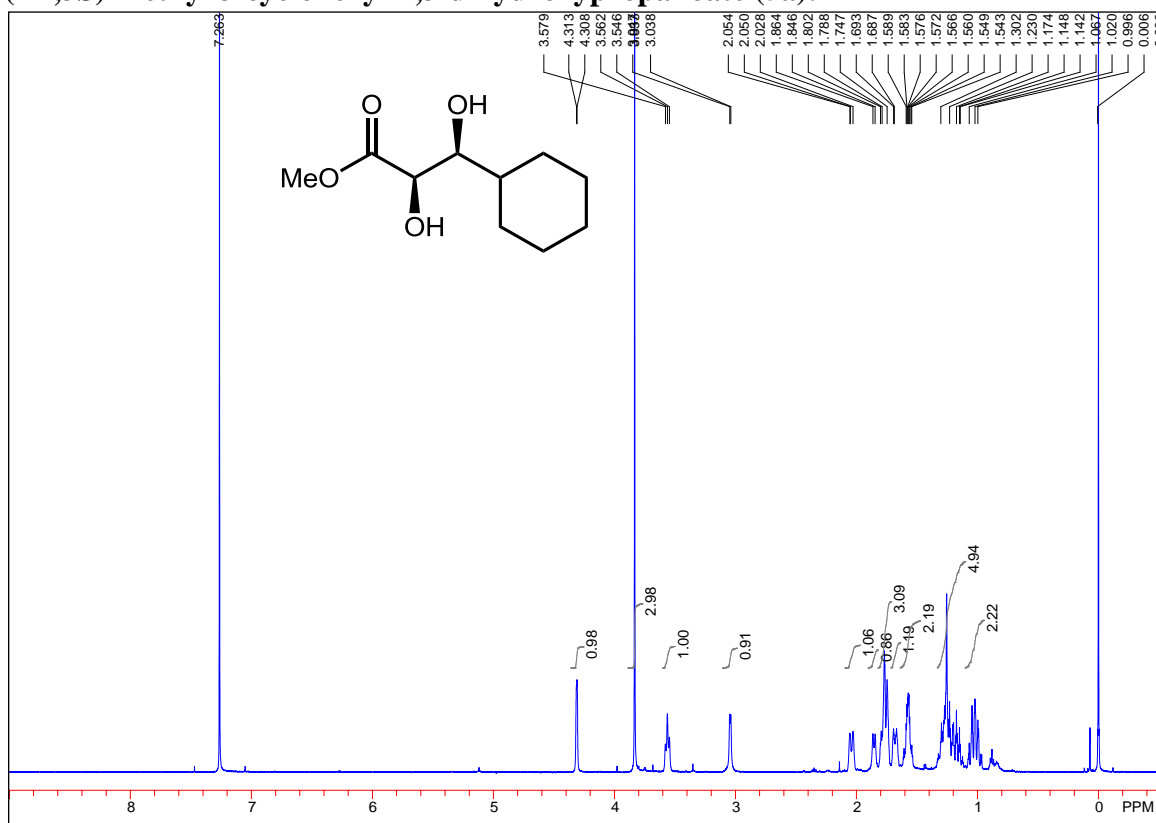

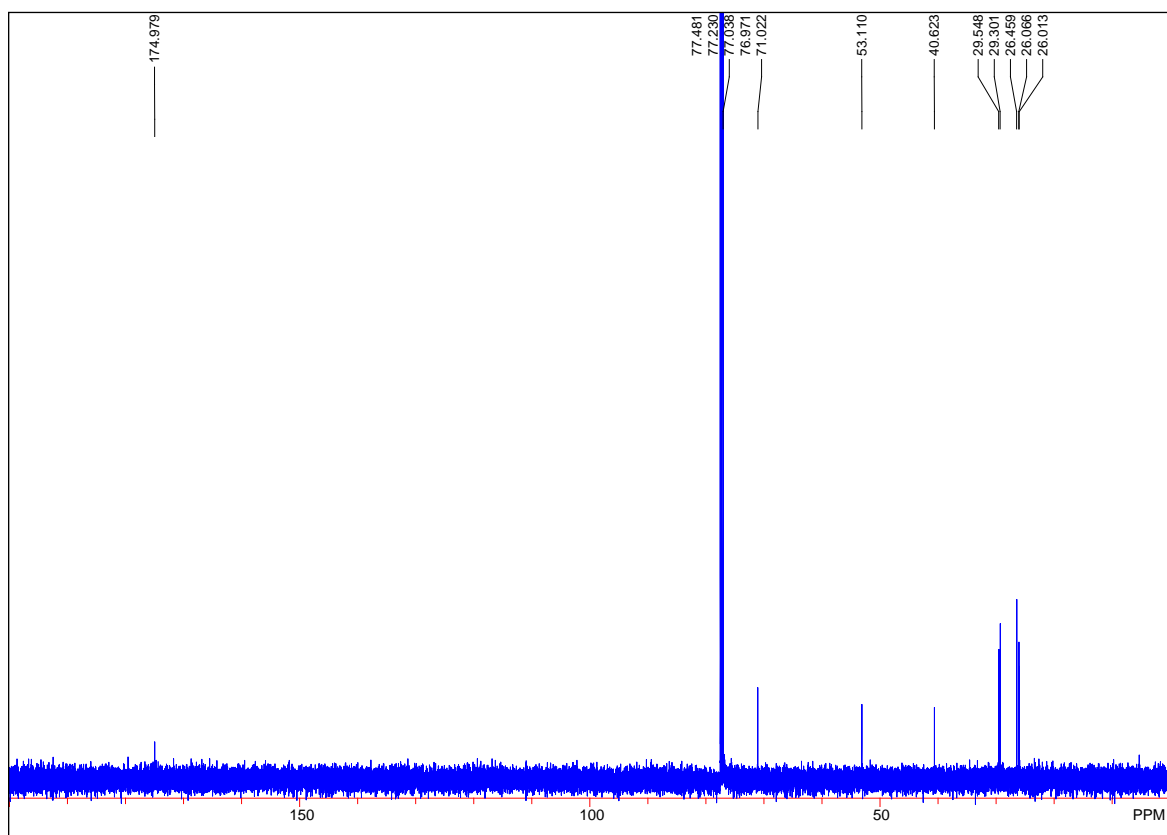

**(2R,3S)-benzyl 3-cyclohexyl-2,3-dihydroxypropanoate (5b):**

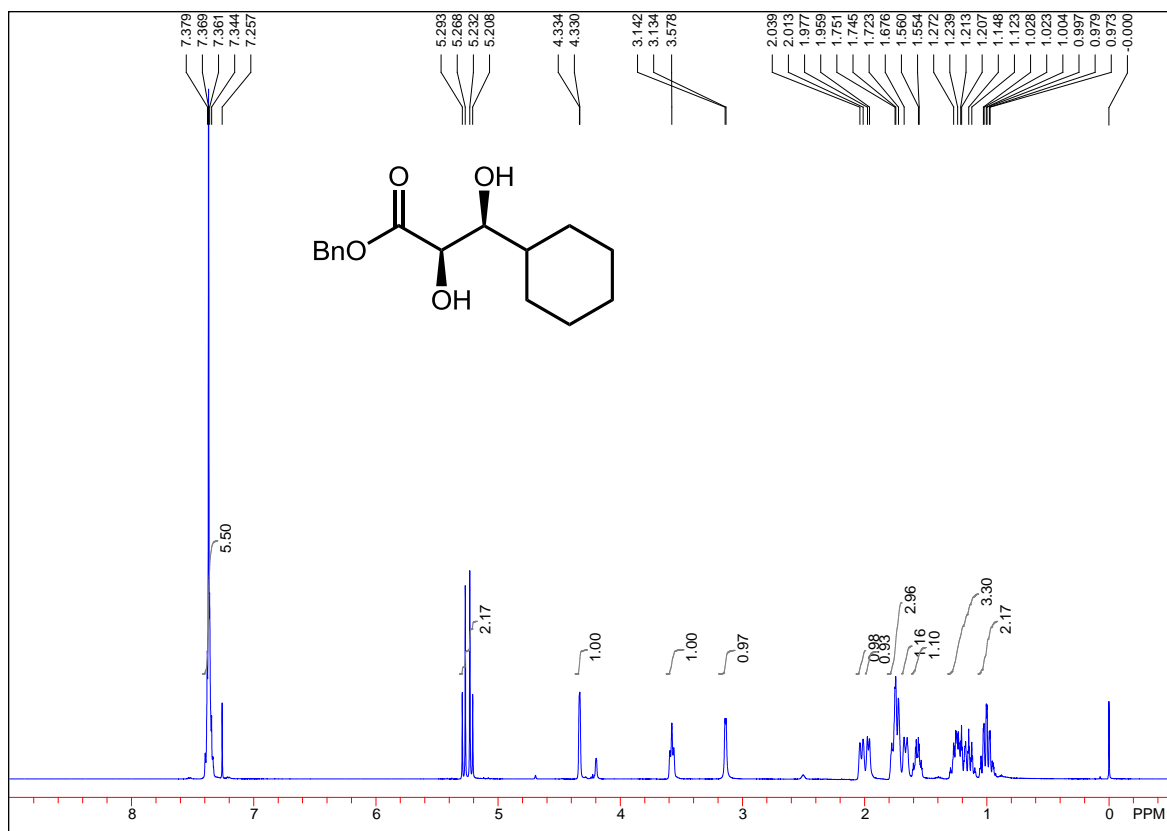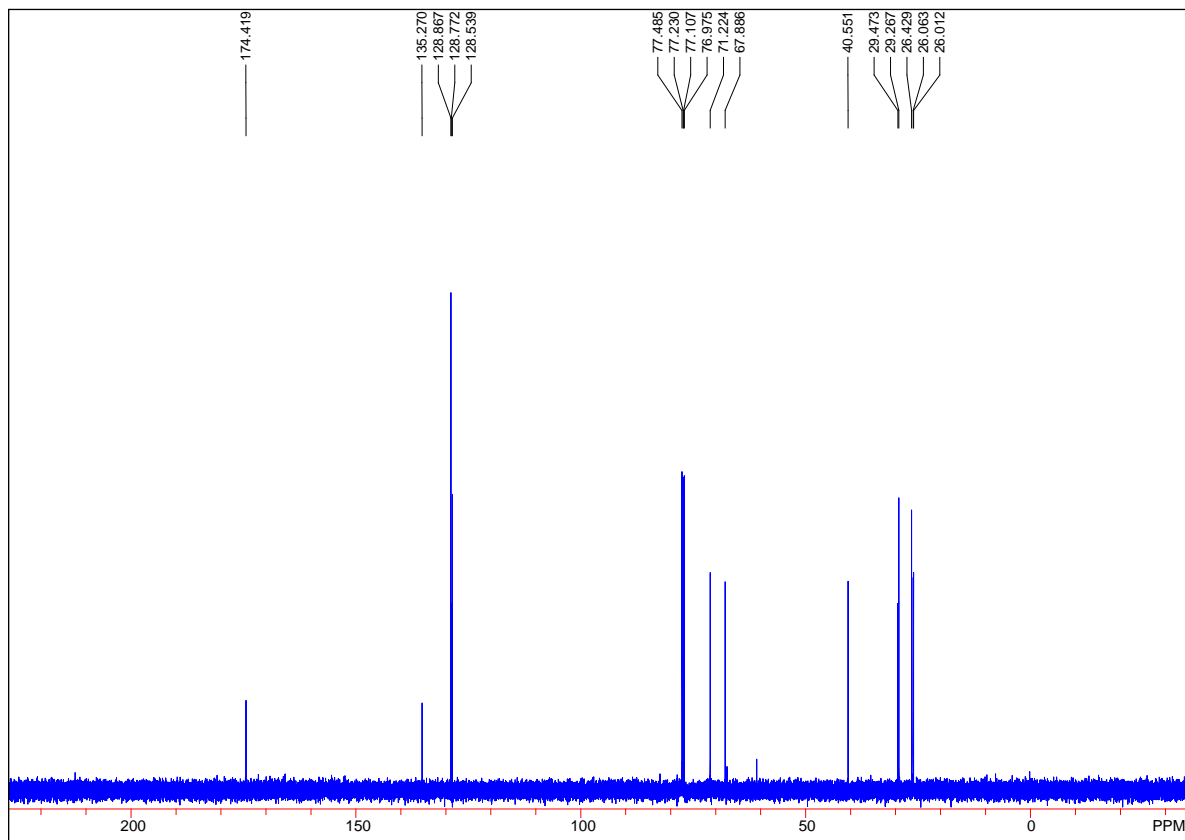

**(2R,3S)-N-benzyl-3-cyclohexyl-2,3-dihydroxypropanamide (5c):**

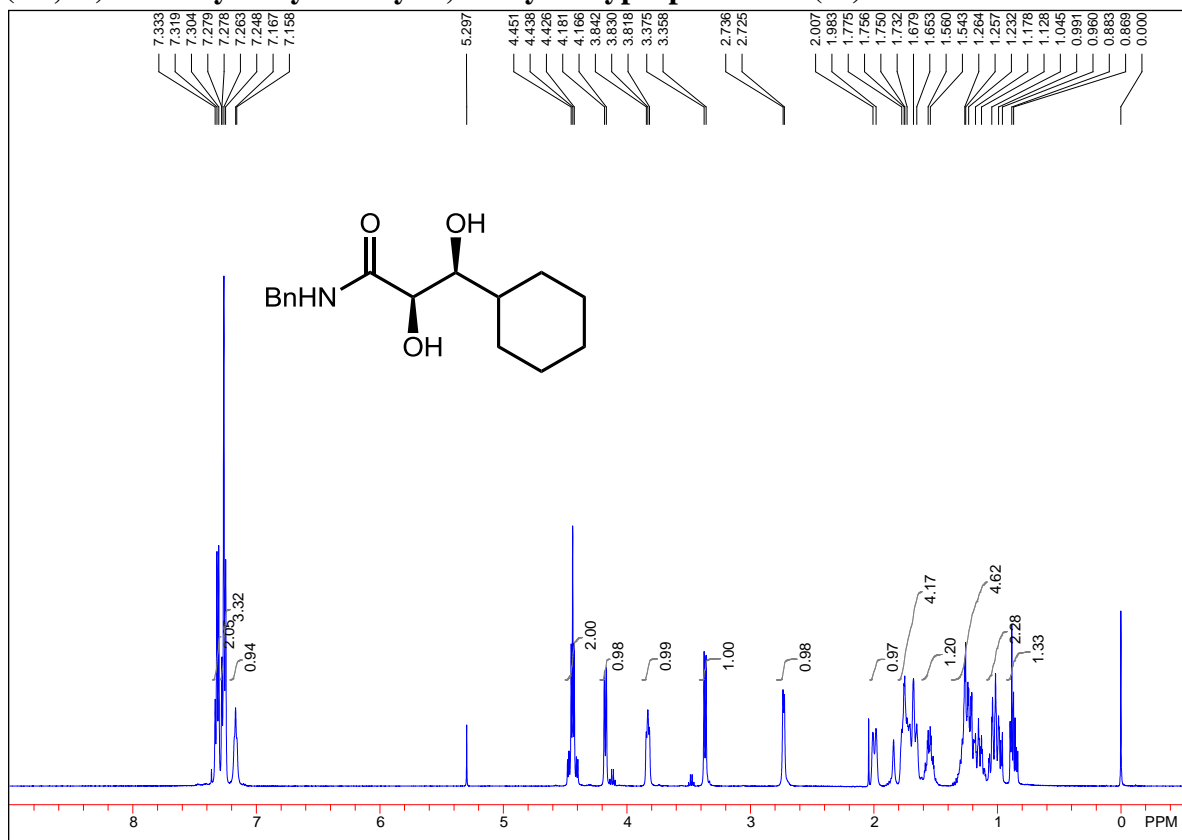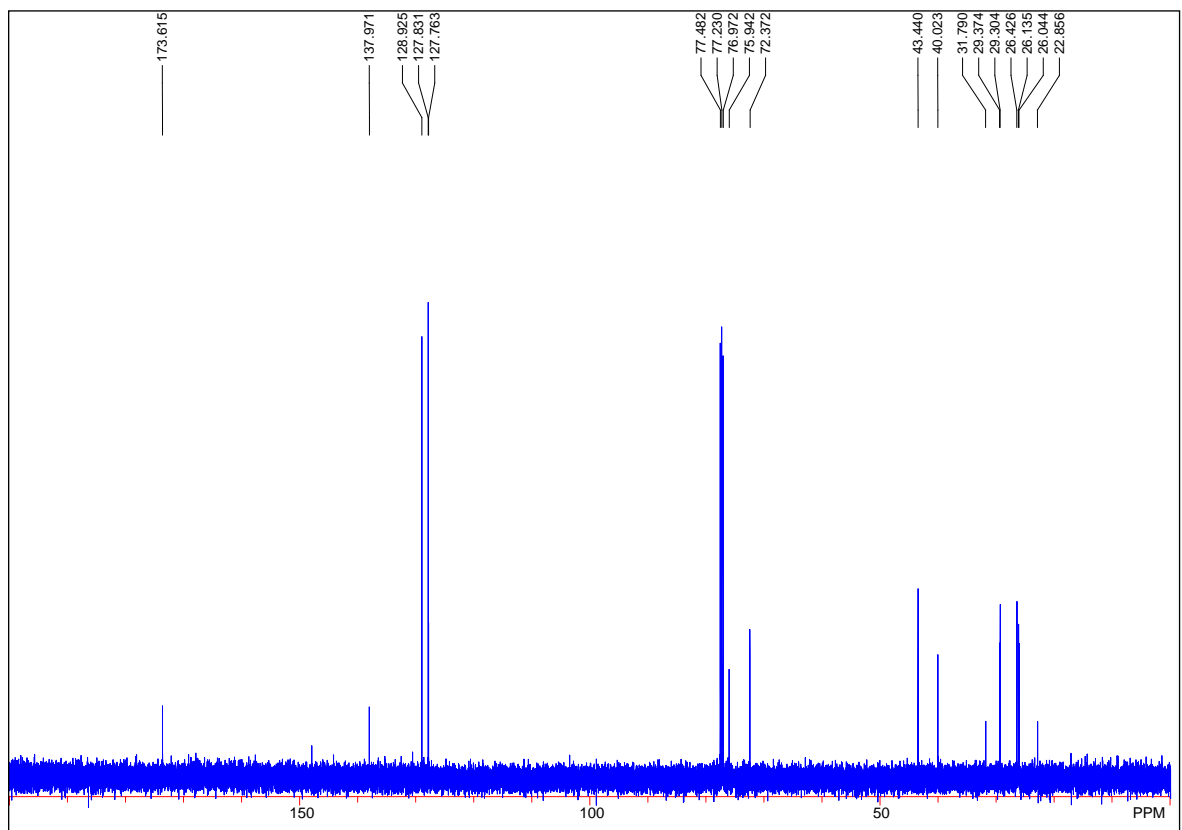

**((4R,5S)-5-cyclohexyl-2,2-dimethyl-1,3-dioxolan-4-yl)(2-ethyl-1H-pyrrol-1-yl)methanone (6):**

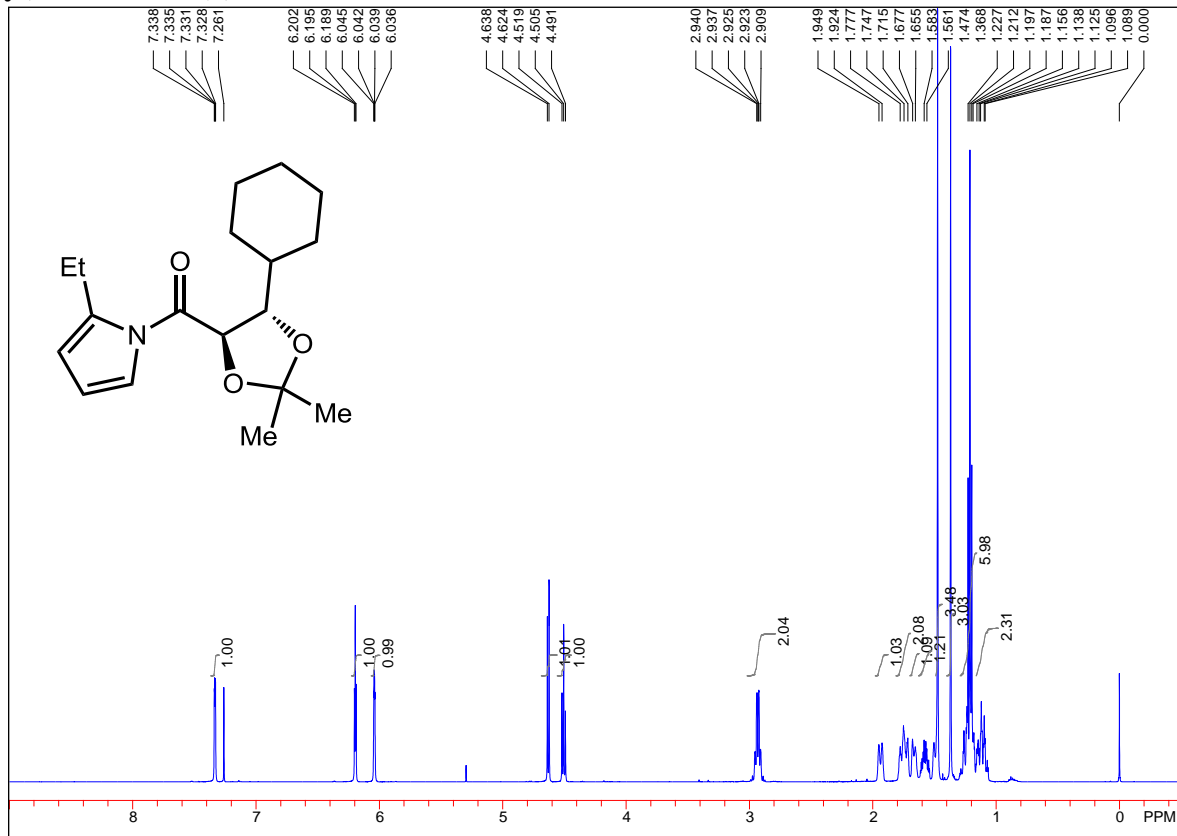

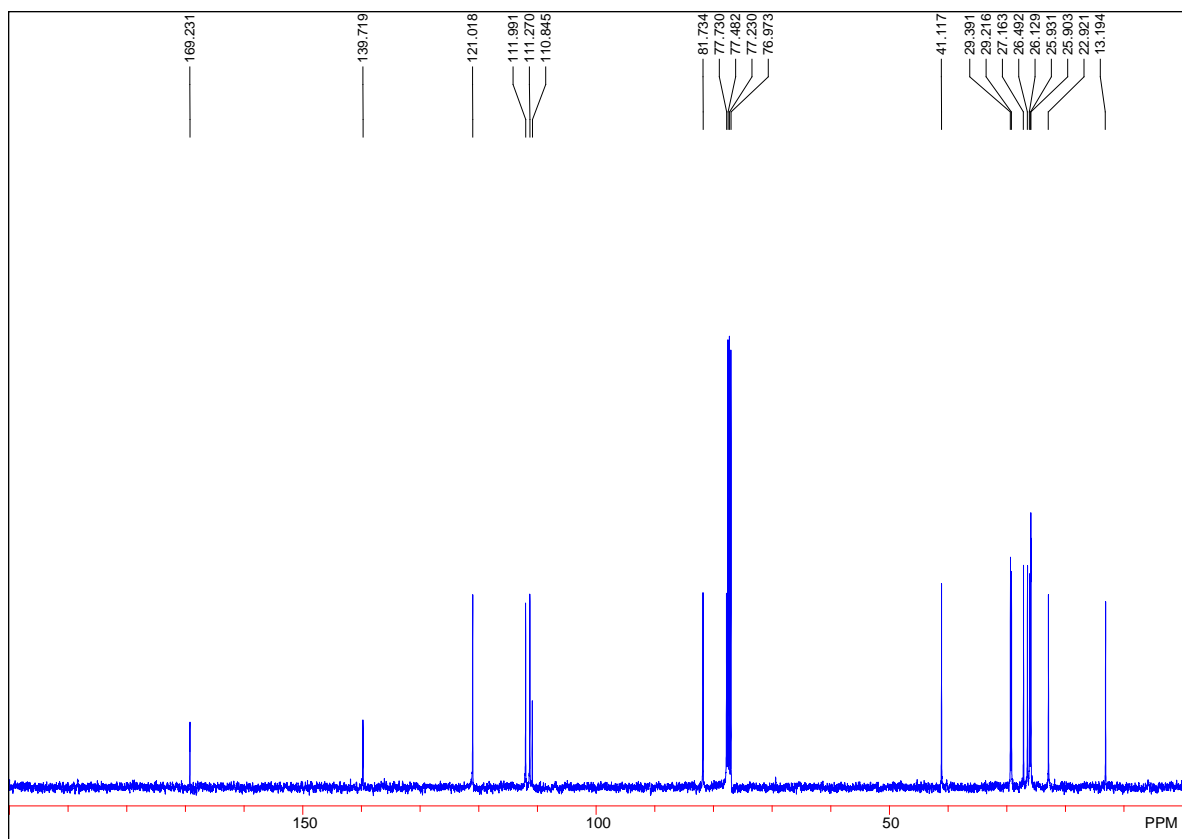

**((4S,5S)-5-cyclohexyl-2,2-dimethyl-1,3-dioxolan-4-yl)methanol (7):**

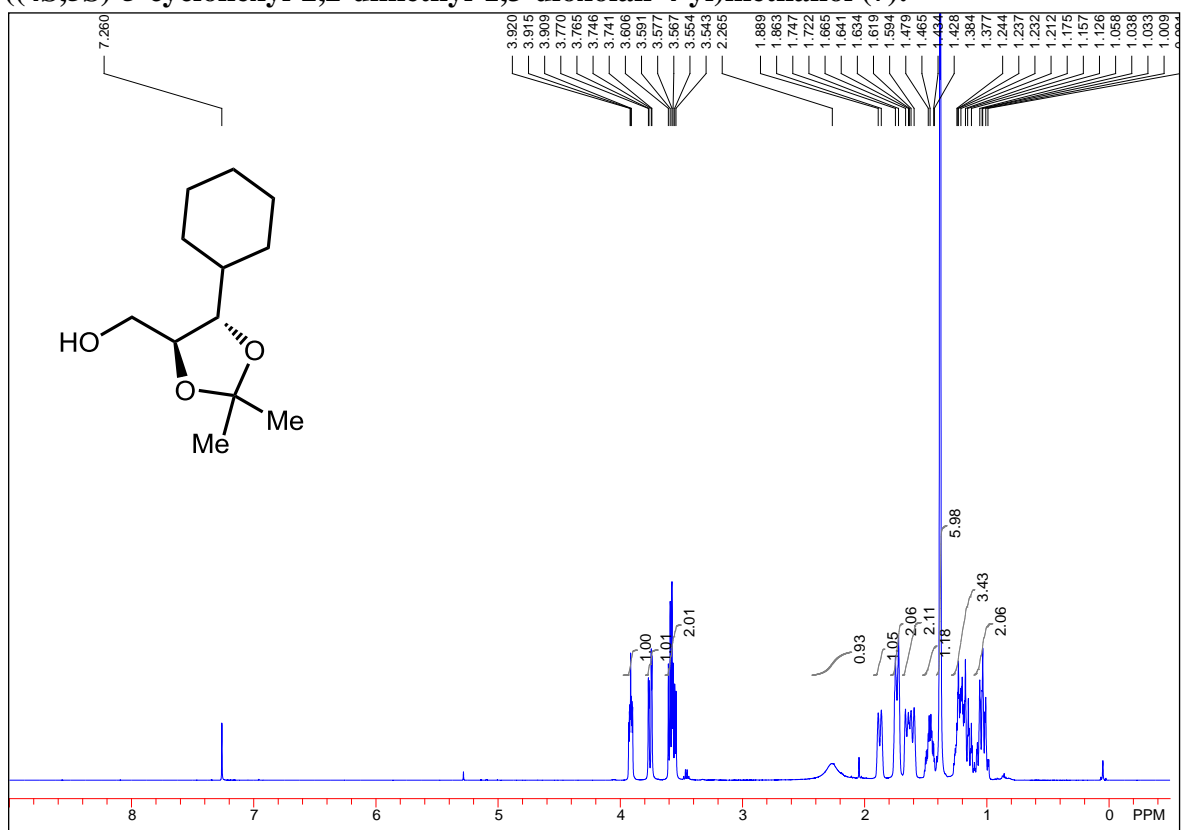

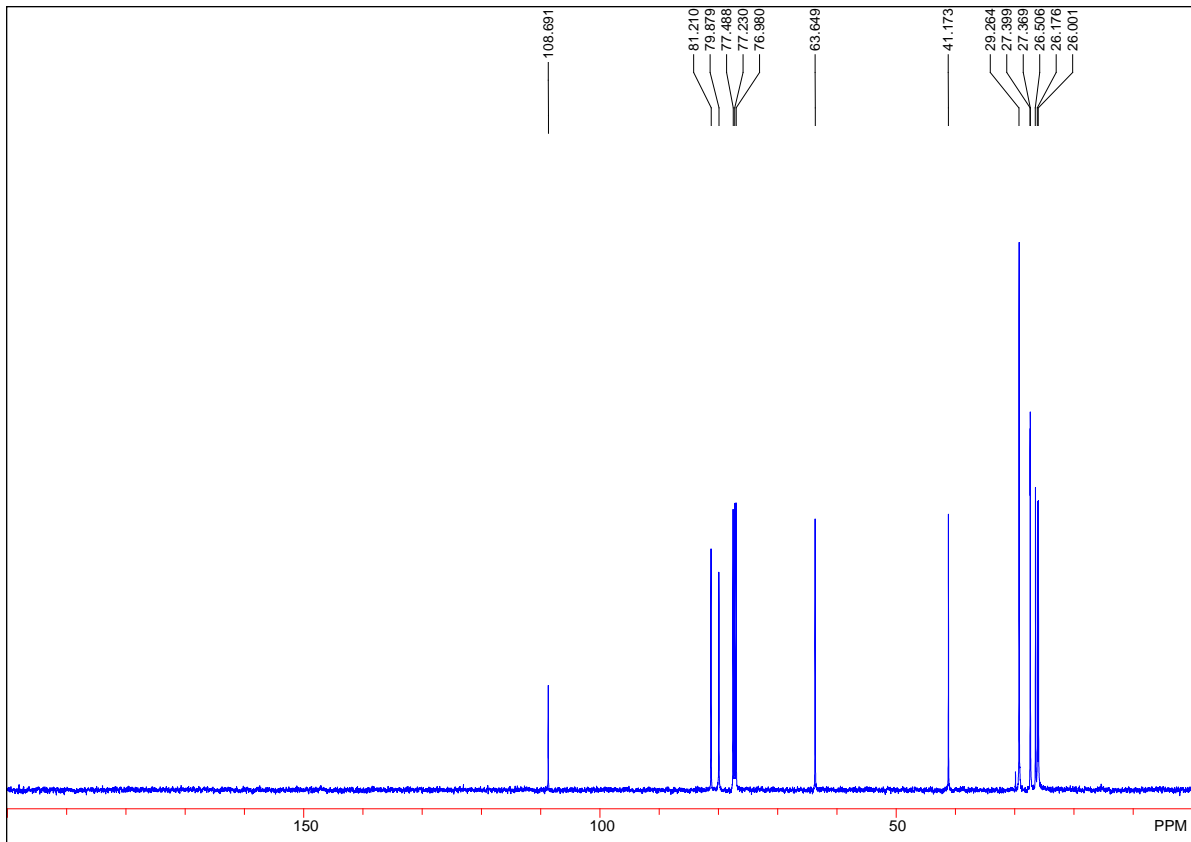

**Cyclohexyl((4R,5S)-5-cyclohexyl-2,2-dimethyl-1,3-dioxolan-4-yl)methanone (8):**

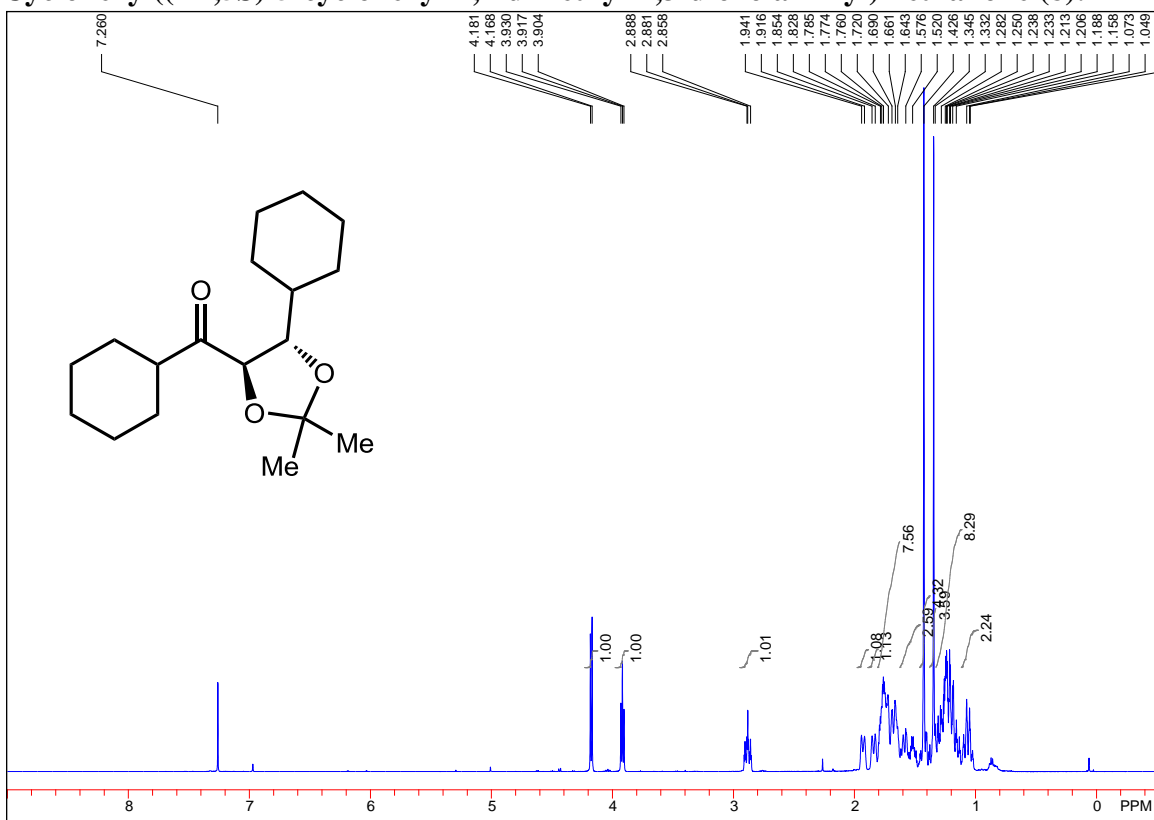



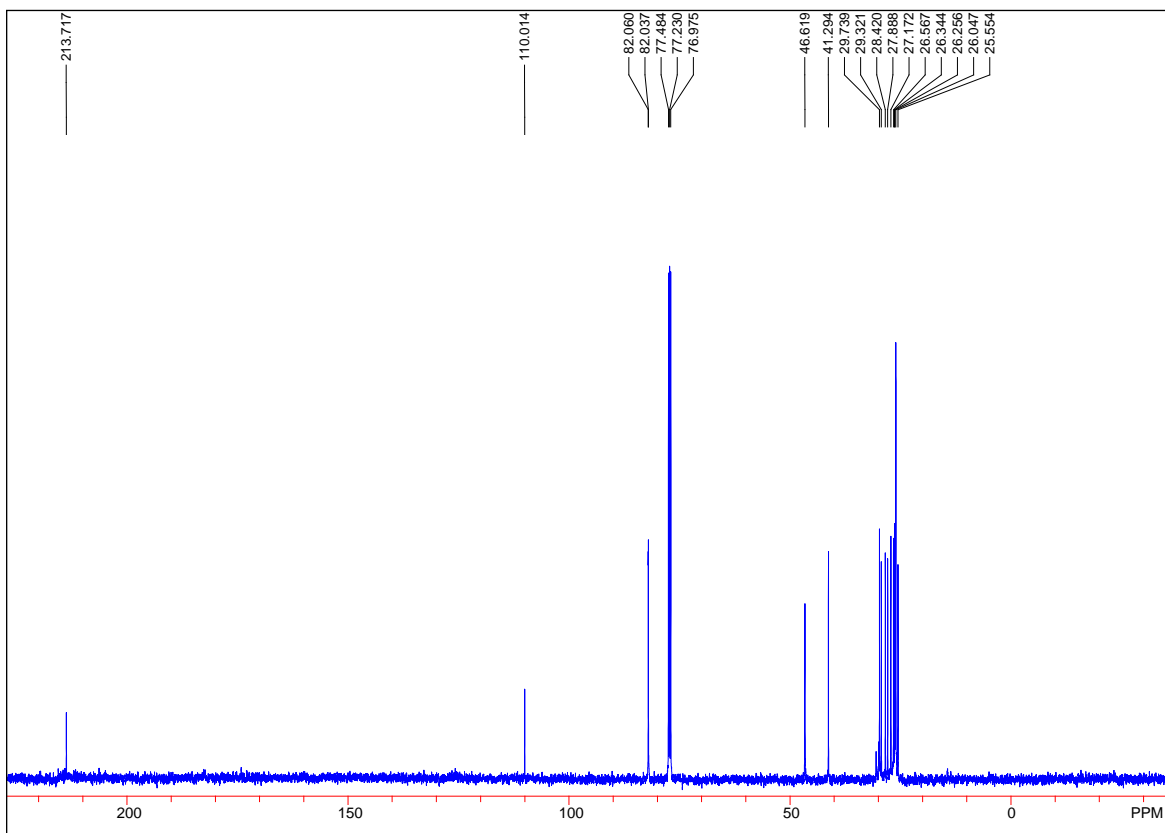

**(2R,3S)-5,5-diethoxy-1-(2-ethyl-1H-pyrrol-1-yl)-2,3-dihydropentan-1-one (3p):**

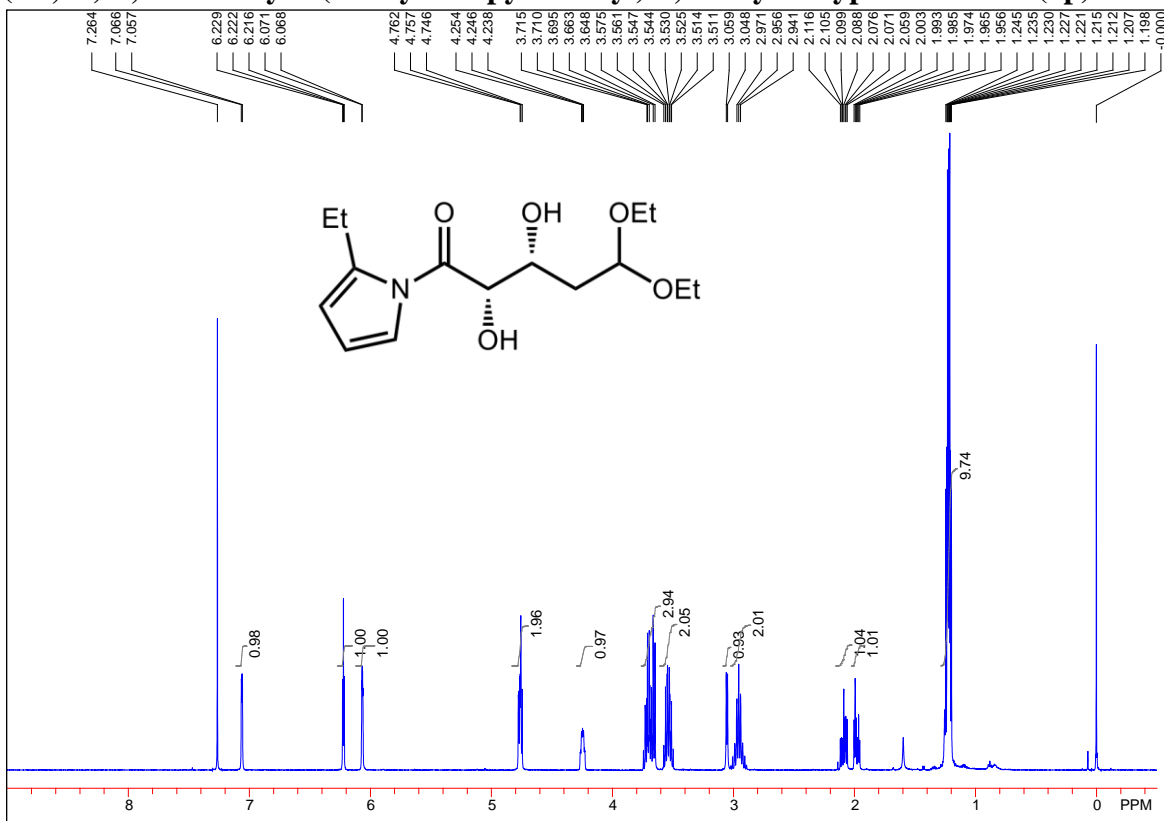

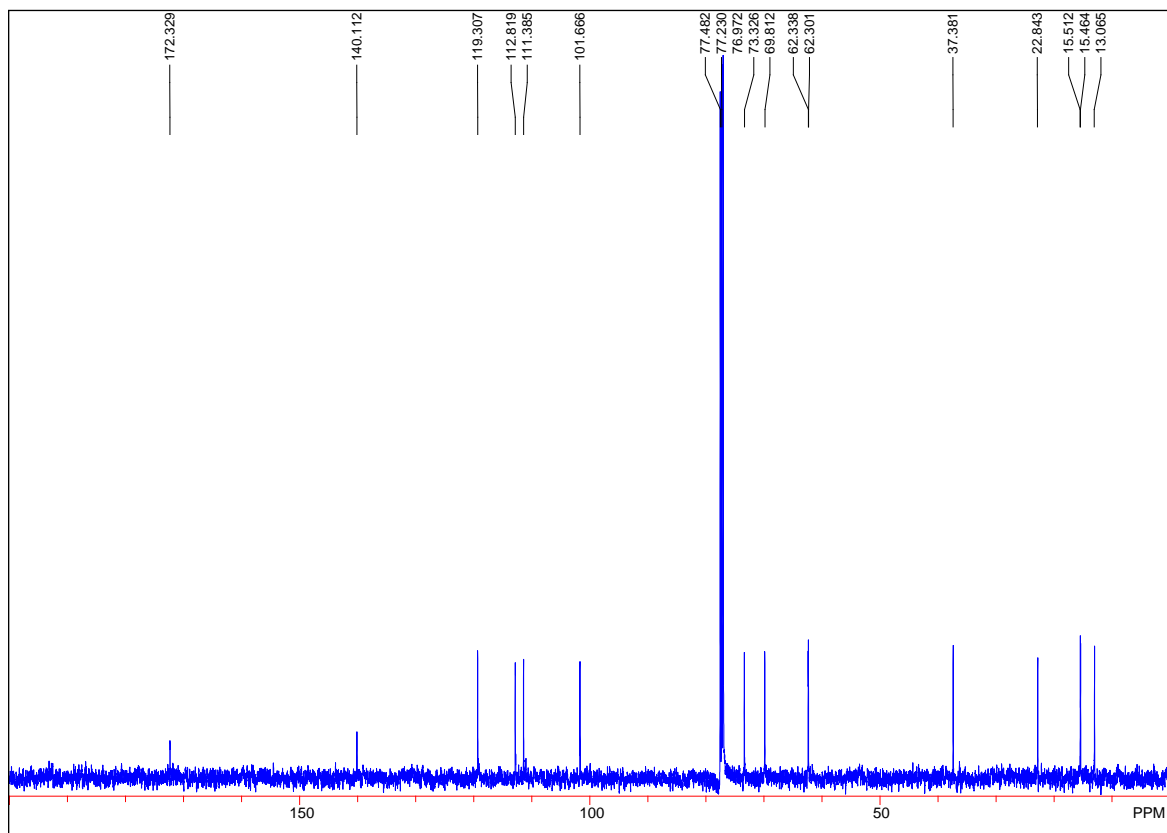

**(2S,3R)-4-(1,3-dioxolan-2-yl)-1-(2-ethyl-1H-pyrrol-1-yl)-2,3-dihydroxybutan-1-one (3q):**

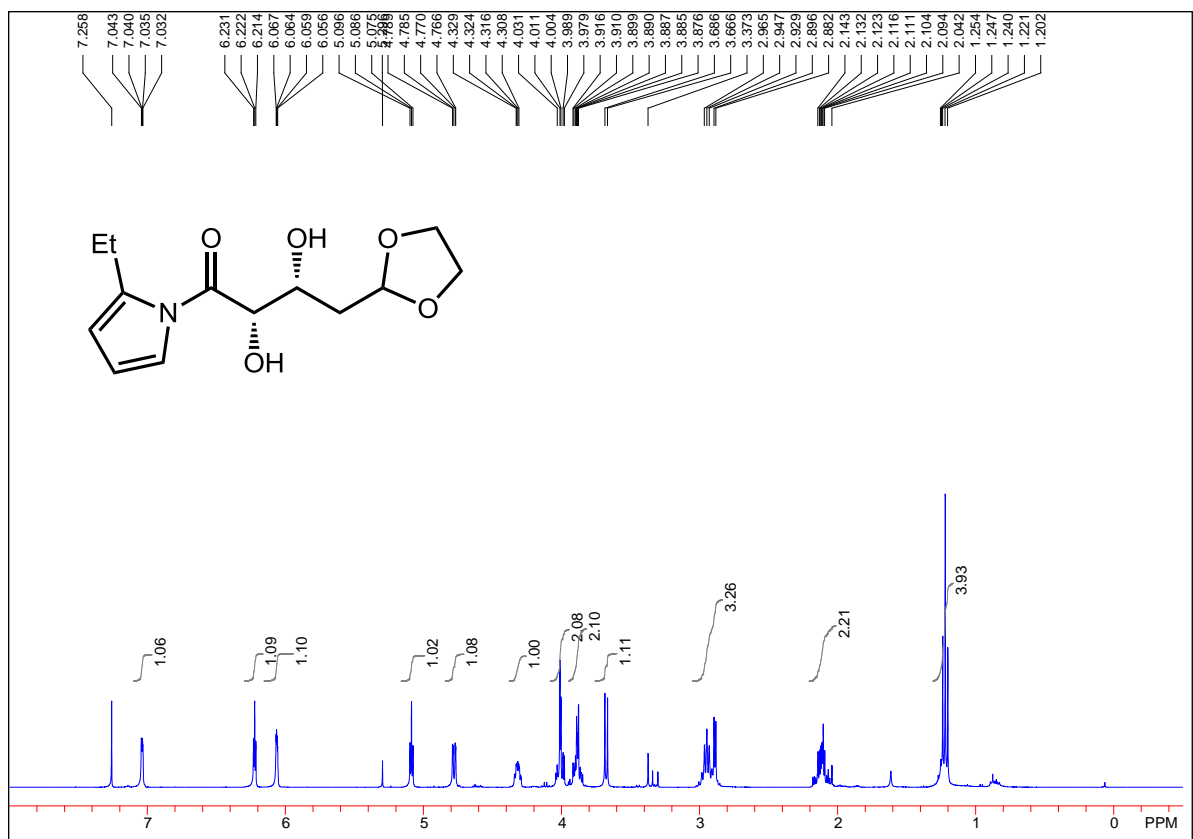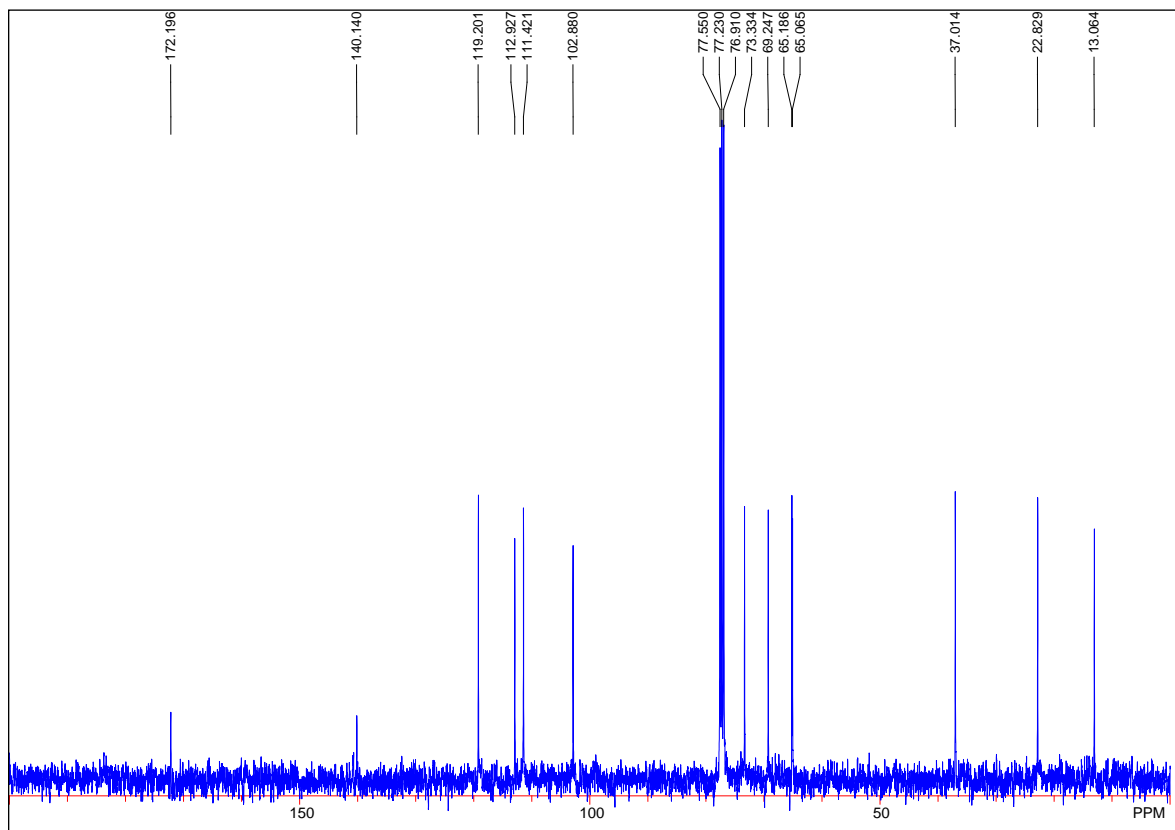

**(2S,3R)-4-(1,3-dioxan-2-yl)-1-(2-ethyl-1H-pyrrol-1-yl)-2,3-dihydroxybutan-1-one**  
**(3r):**

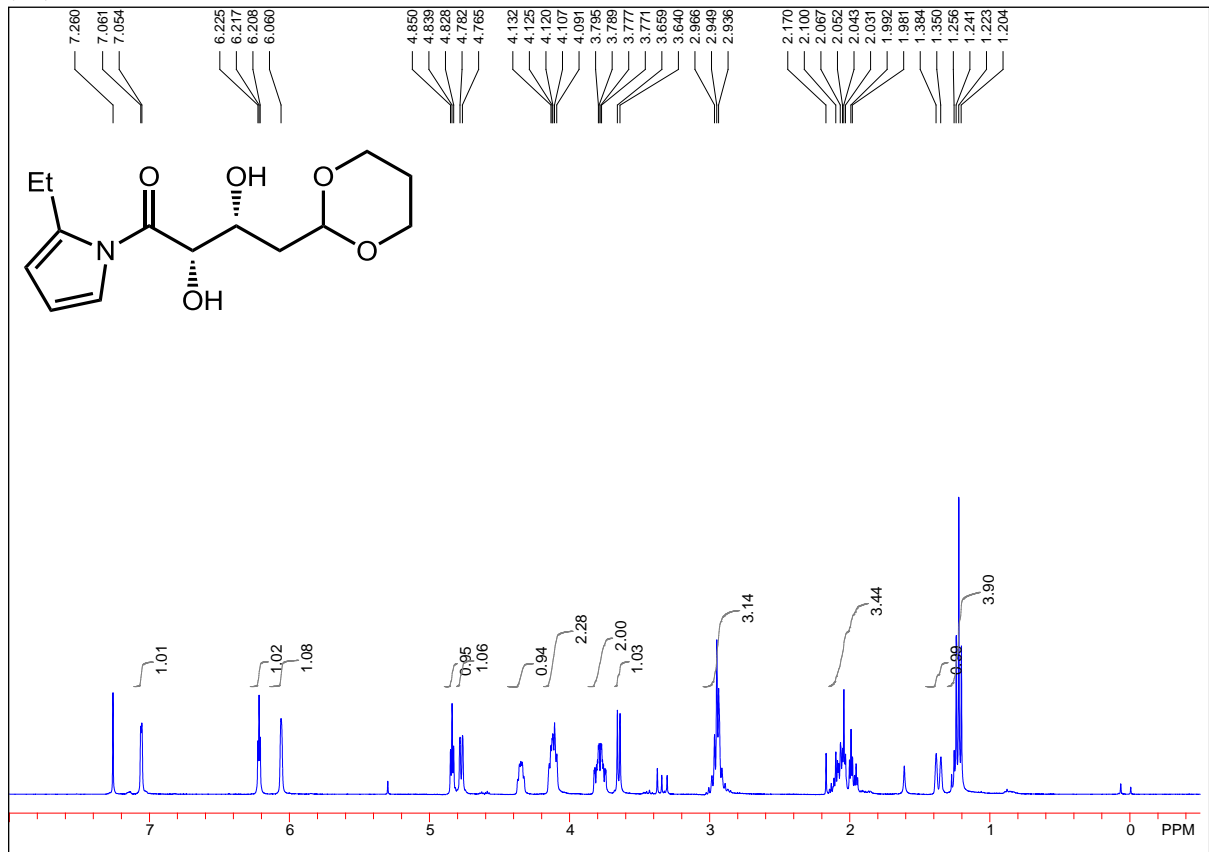

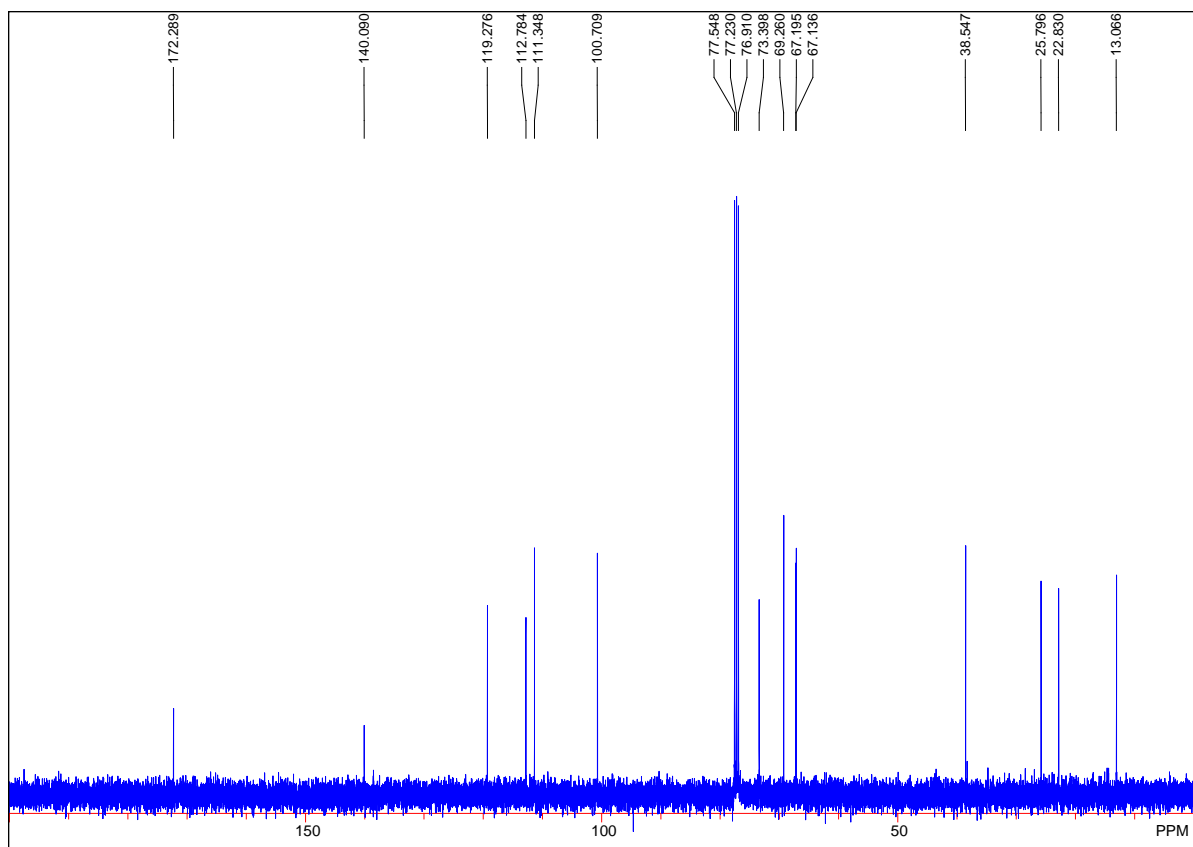

**HPLC Traces for Table 2 and Scheme 4.**

**(2R,3S)-3-cyclohexyl-1-(2-ethyl-1H-pyrrol-1-yl)-2,3-dihydroxypropan-1-one (3c):**

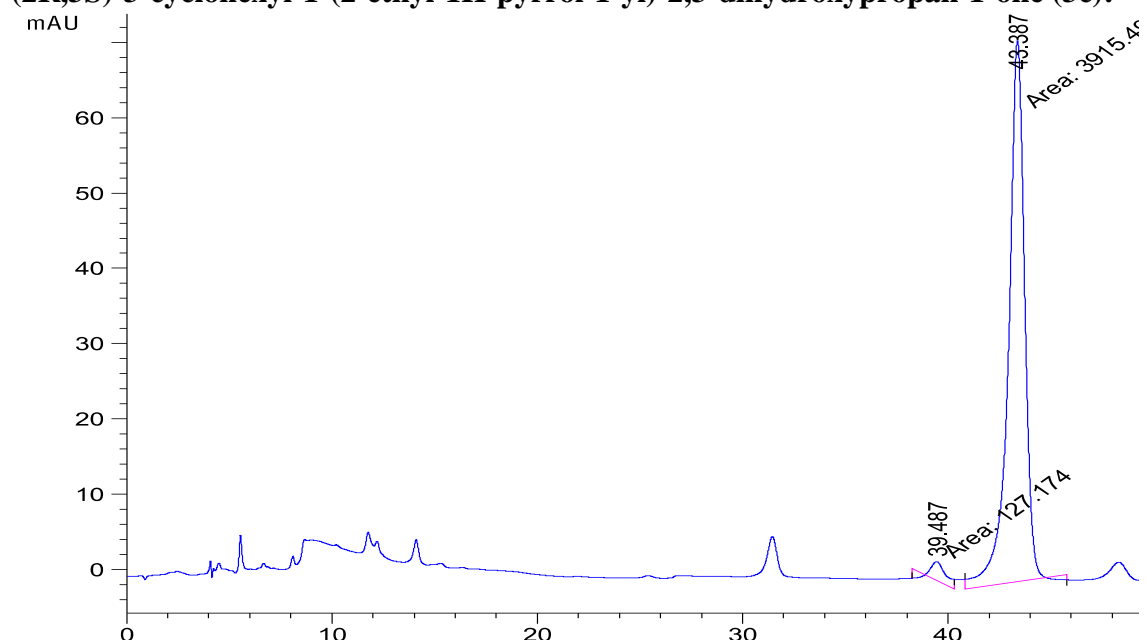

| Peak # | RetTime [min] | Type | Width [min] | Area mAU *s | Height [mAU] | Area %  |
|--------|---------------|------|-------------|-------------|--------------|---------|
| 1      | 39.487        | MM   | 0.8374      | 127.17352   | 2.53100      | 3.1458  |
| 2      | 43.387        | MM   | 0.9091      | 3915.49316  | 71.78629     | 96.8542 |

**(2R,3S)-1-(2-ethyl-1H-pyrrol-1-yl)-2,3-dihydroxy-4-methylpentan-1-one (3d):**

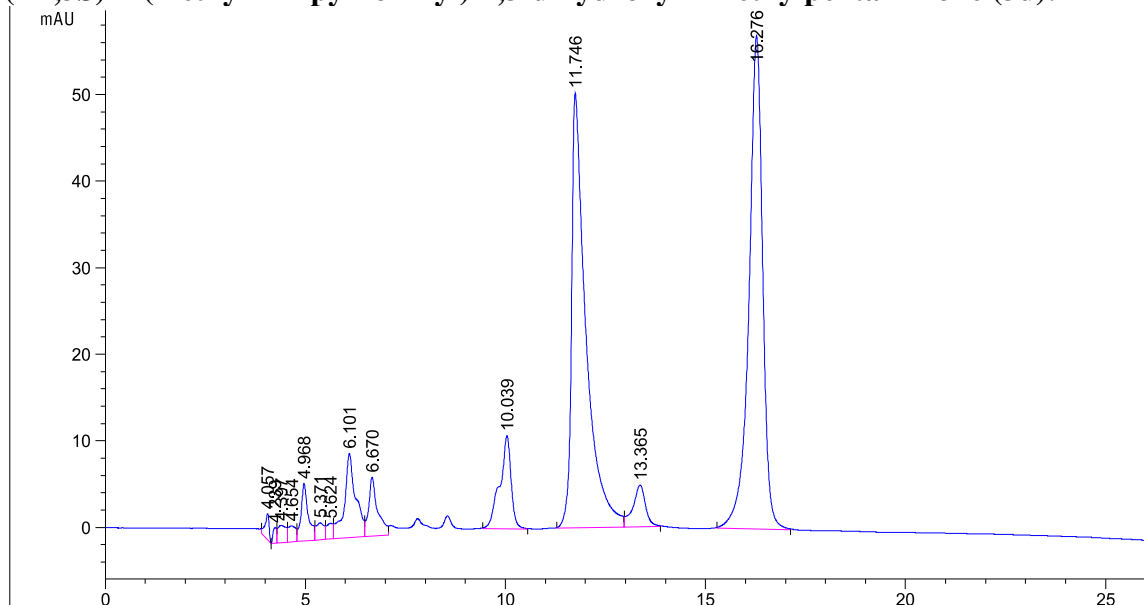

| Peak # | Time [min] | Type | Width [min] | Area mAU *s | Height [mAU] | Area %  |
|--------|------------|------|-------------|-------------|--------------|---------|
| 1      | 4.057      | BV   | 0.1001      | 20.47013    | 2.99541      | 0.5920  |
| 2      | 4.239      | VV   | 0.0940      | 10.87306    | 1.79491      | 0.3145  |
| 3      | 4.397      | VV   | 0.1964      | 29.42323    | 2.01713      | 0.8510  |
| 4      | 4.654      | VV   | 0.1985      | 24.57318    | 1.85130      | 0.7107  |
| 5      | 4.968      | VB   | 0.1745      | 82.82141    | 6.64795      | 2.3953  |
| 6      | 5.371      | BV   | 0.1980      | 28.74104    | 1.96869      | 0.8312  |
| 7      | 5.624      | VV   | 0.1548      | 20.60103    | 1.82781      | 0.5958  |
| 8      | 6.101      | VV   | 0.2703      | 194.64032   | 9.77045      | 5.6292  |
| 9      | 6.670      | VV   | 0.2156      | 107.38747   | 6.82430      | 3.1058  |
| 10     | 10.039     | BB   | 0.2776      | 213.15219   | 10.76470     | 6.1646  |
| 11     | 11.746     | BB   | 0.3458      | 1257.36609  | 50.25687     | 36.3643 |
| 12     | 13.365     | BB   | 0.3207      | 106.89573   | 4.85967      | 3.0915  |
| 13     | 16.276     | BB   | 0.3543      | 1360.74622  | 56.99484     | 39.3542 |

**(2R,3S)-4-ethyl-1-(2-ethyl-1H-pyrrol-1-yl)-2,3-dihydroxyhexan-1-one (3e):**

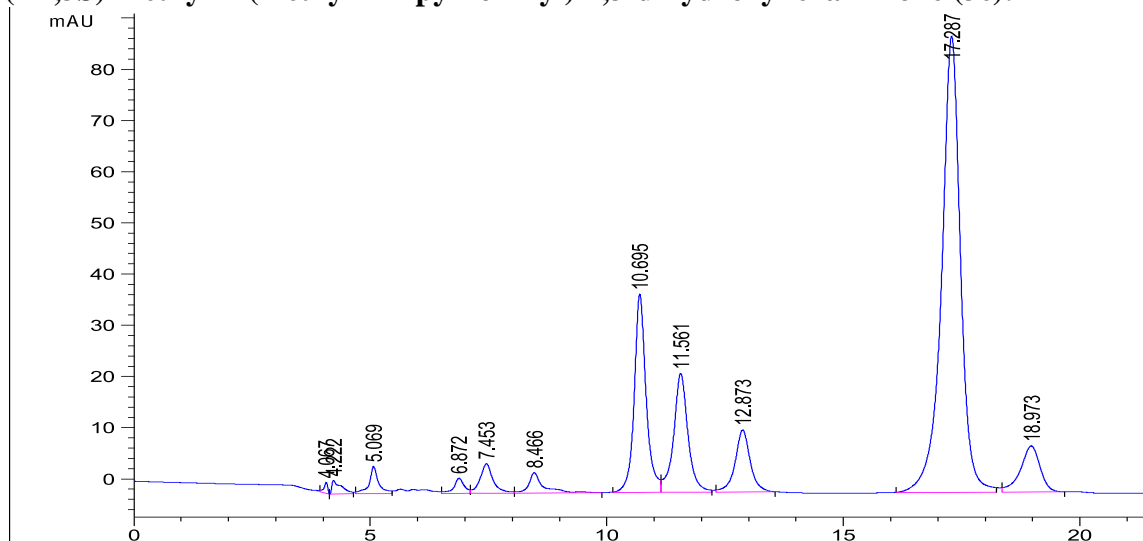

| Peak # | RetTime [min] | Type | Width [min] | Area mAU *s | Height [mAU ] | Area %  |
|--------|---------------|------|-------------|-------------|---------------|---------|
| 1      | 4.067         | BV   | 0.0807      | 11.23573    | 2.07181       | 0.1998  |
| 2      | 4.222         | VB   | 0.1848      | 36.83178    | 2.61298       | 0.6551  |
| 3      | 5.069         | BB   | 0.1970      | 75.18270    | 5.31616       | 1.3372  |
| 4      | 6.872         | VV   | 0.2195      | 45.23331    | 2.95206       | 0.8045  |
| 5      | 7.453         | VV   | 0.2686      | 109.99516   | 5.77910       | 1.9563  |
| 6      | 8.466         | VB   | 0.2954      | 85.69457    | 3.97224       | 1.5241  |
| 7      | 10.695        | BV   | 0.2591      | 680.90759   | 38.71127      | 12.1104 |
| 8      | 11.561        | VB   | 0.3113      | 491.92499   | 23.21737      | 8.7492  |
| 9      | 12.873        | BB   | 0.3306      | 270.96432   | 12.12619      | 4.8193  |
| 10     | 17.287        | BB   | 0.4134      | 2489.56445  | 89.07103      | 44.2785 |
| 11     | 18.973        | BB   | 0.4312      | 259.24609   | 8.98709       | 4.6109  |
| 12     | 22.890        | BB   | 0.8213      | 1065.73108  | 16.93998      | 18.9547 |



**(2R,3S)-1-(2-ethyl-1H-pyrrol-1-yl)-2,3-dihydroxy-5-methylhexan-1-one (3f):**

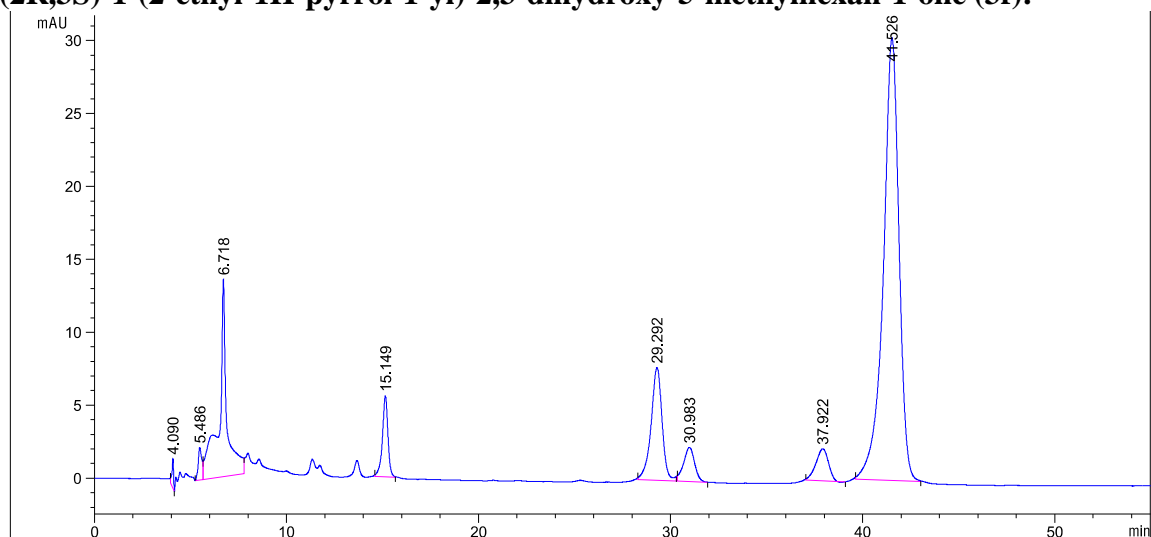

| Peak # | Time [min] | Type | Width [min] | Area mAU * s | Height [mAU] | Area %  |
|--------|------------|------|-------------|--------------|--------------|---------|
| 3      | 6.718      | VB   | 0.3675      | 385.98544    | 13.54246     | 13.9925 |
| 4      | 15.149     | BB   | 0.2984      | 110.50639    | 5.53534      | 4.0060  |
| 5      | 29.292     | BB   | 0.5943      | 306.26480    | 7.73644      | 11.1025 |
| 6      | 30.983     | BB   | 0.5953      | 94.06754     | 2.34918      | 3.4101  |
| 7      | 37.922     | BB   | 0.6487      | 98.17845     | 2.19416      | 3.5591  |
| 8      | 41.526     | BB   | 0.8499      | 1722.27637   | 30.34835     | 62.4350 |

**(2R,3S)-1-(2-ethyl-1H-pyrrol-1-yl)-2,3-dihydroxyheptan-1-one (3g):**

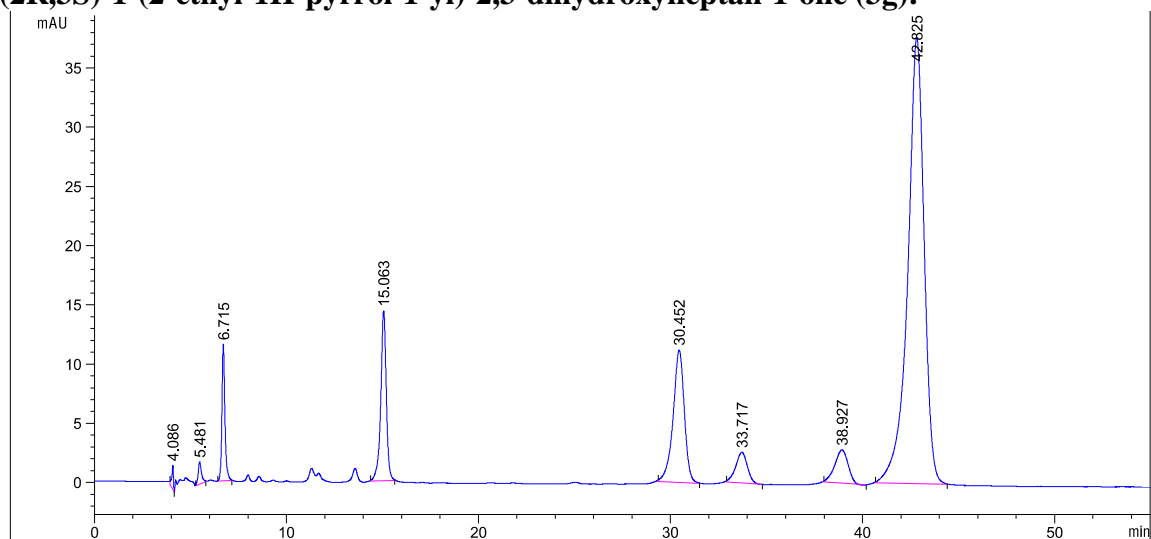

| Peak # | Retention Time [min] | Type | Width [min] | Area mAU*s | Height [mAU] | Area %  |
|--------|----------------------|------|-------------|------------|--------------|---------|
| 3      | 6.715                | BB   | 0.1618      | 125.66795  | 11.55608     | 3.7079  |
| 4      | 15.063               | BB   | 0.2980      | 288.07629  | 14.36572     | 8.4997  |
| 5      | 30.452               | BB   | 0.6139      | 453.68573  | 11.16448     | 13.3861 |
| 6      | 33.717               | BB   | 0.6171      | 109.38528  | 2.59426      | 3.2274  |
| 7      | 38.927               | BB   | 0.6854      | 135.51190  | 2.81489      | 3.9983  |
| 8      | 42.825               | BB   | 0.8841      | 2242.33472 | 37.65204     | 66.1605 |

**(2R,3S)-1-(2-ethyl-1H-pyrrol-1-yl)-2,3-dihydroxy-5-phenylpentan-1-one (3h):**

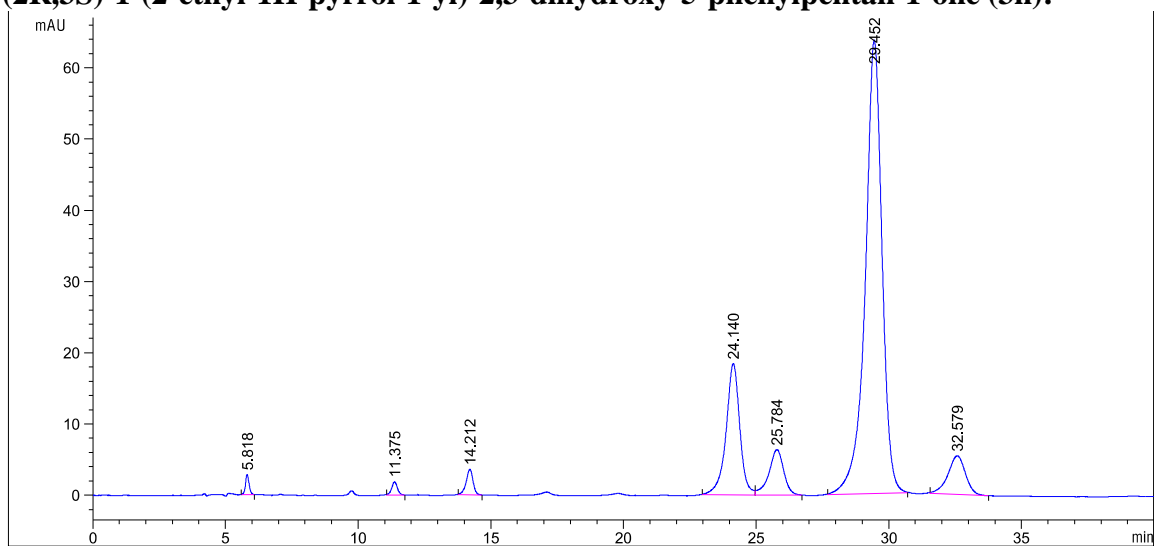

| Peak # | Time [min] | Type | Width [min] | Area mAU*s | Height [mAU] | Area %  |
|--------|------------|------|-------------|------------|--------------|---------|
| 1      | 5.818      | BB   | 0.1445      | 27.44228   | 2.84593      | 0.6726  |
| 2      | 11.375     | BB   | 0.2256      | 28.23247   | 1.87077      | 0.6920  |
| 3      | 14.212     | BB   | 0.2739      | 65.86465   | 3.61240      | 1.6143  |
| 4      | 24.140     | BV   | 0.5372      | 665.49609  | 18.45604     | 16.3111 |
| 5      | 25.784     | VB   | 0.5805      | 249.15974  | 6.40584      | 6.1068  |
| 6      | 29.452     | BB   | 0.6539      | 2797.13184 | 63.65399     | 68.5566 |
| 7      | 32.579     | BB   | 0.6733      | 246.70294  | 5.40946      | 6.0466  |

Totals : 4080.03001 102.25444

**(2R,3S)-1-(2-ethyl-1H-pyrrol-1-yl)-2,3-dihydroxy-4-(2-methyl-1,3-dioxan-2-yl)butan-1-one (3i):**

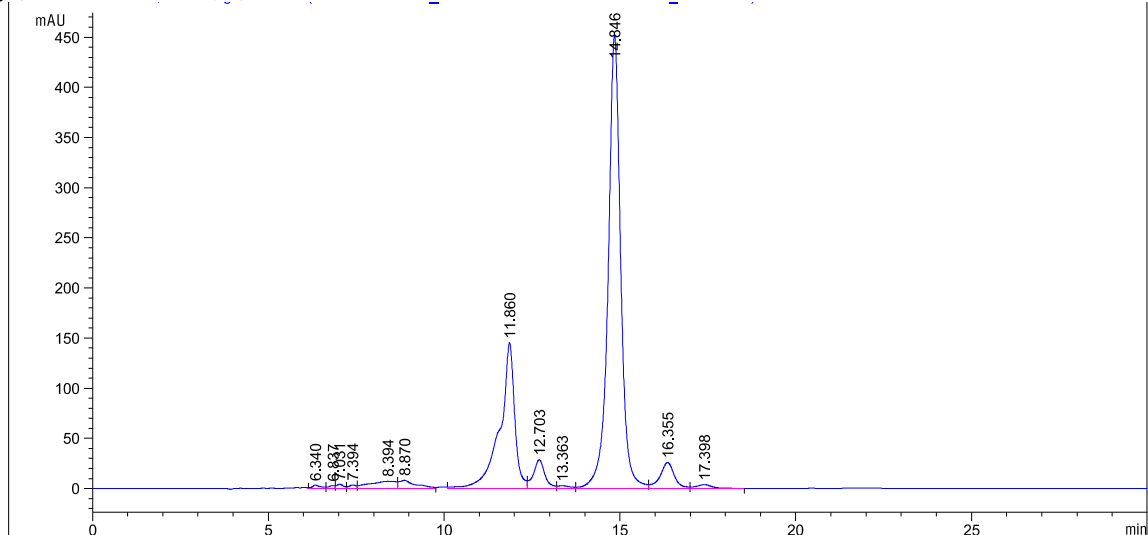

| Peak # | Time [min] | Type | Width [min] | Area mAU *s | Height [mAU] | Area %  |
|--------|------------|------|-------------|-------------|--------------|---------|
| 1      | 6.340      | VV   | 0.2302      | 51.66825    | 3.13445      | 0.2896  |
| 2      | 6.837      | VV   | 0.1783      | 32.30010    | 2.71125      | 0.1810  |
| 3      | 7.031      | VV   | 0.1915      | 54.23491    | 4.08024      | 0.3040  |
| 4      | 7.394      | VV   | 0.2042      | 47.46297    | 3.32793      | 0.2660  |
| 5      | 8.394      | VV   | 0.7057      | 366.96234   | 7.05646      | 2.0568  |
| 6      | 8.870      | VV   | 0.4388      | 266.91818   | 8.02849      | 1.4961  |
| 7      | 11.860     | VV   | 0.4036      | 4256.51025  | 145.02238    | 23.8575 |
| 8      | 12.703     | VV   | 0.3316      | 648.47833   | 28.59179     | 3.6347  |
| 9      | 13.363     | VV   | 0.3472      | 63.80077    | 2.65619      | 0.3576  |
| 10     | 14.846     | VV   | 0.3680      | 1.12065e4   | 451.83545    | 62.8120 |
| 11     | 16.355     | VV   | 0.4166      | 728.69110   | 25.81748     | 4.0843  |
| 12     | 17.398     | VB   | 0.4642      | 117.83560   | 3.69130      | 0.6605  |

**(2R,3S)-1-(2-ethyl-1H-pyrrol-1-yl)-2,3-dihydroxy-4,4-dimethylpentan-1-one (3j):**

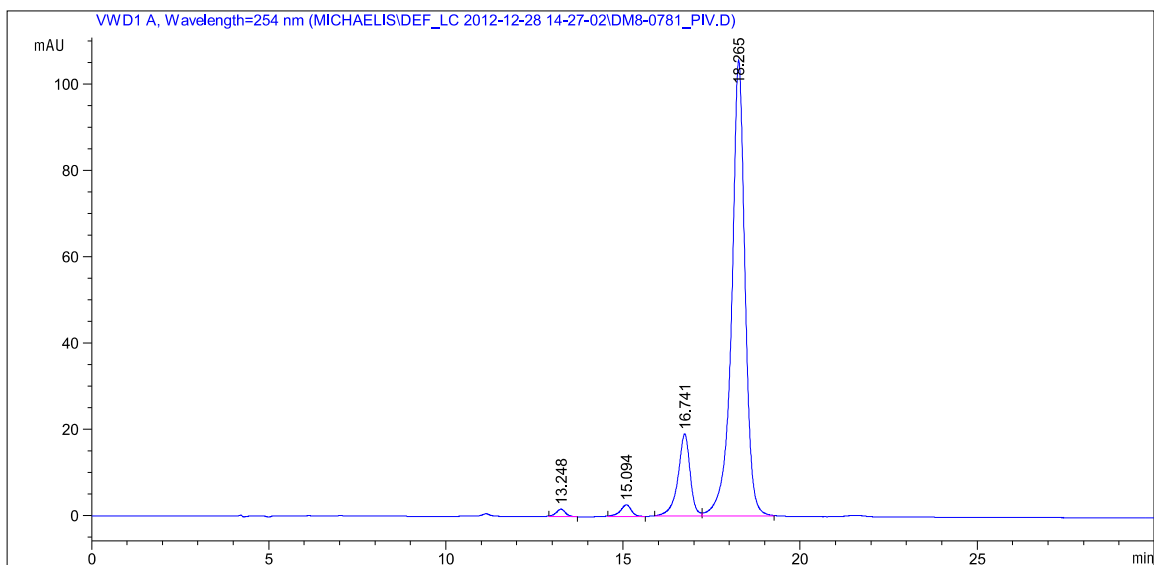

| Peak # | Retention Time [min] | Type | Width [min] | Area mAU * s | Height [mAU] | Area %  |
|--------|----------------------|------|-------------|--------------|--------------|---------|
| 1      | 13.248               | BB   | 0.2776      | 31.21518     | 1.71676      | 0.9394  |
| 2      | 15.094               | BB   | 0.3164      | 56.98517     | 2.69713      | 1.7150  |
| 3      | 16.741               | BV   | 0.3570      | 455.92886    | 19.00949     | 13.7211 |
| 4      | 18.265               | VB   | 0.3872      | 2778.70386   | 105.55822    | 83.6245 |

**(2R,3R)-4,4-diethoxy-1-(2-ethyl-1H-pyrrol-1-yl)-2,3-dihydroxyhept-6-en-1-one (3k):**

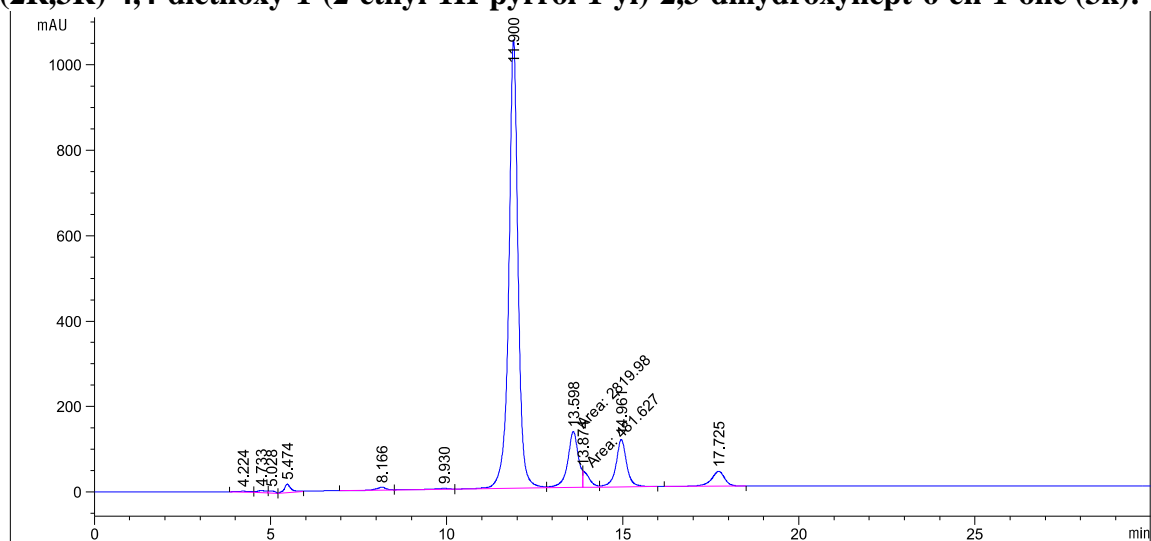

| Peak # | Time [min] | Type | Width [min] | Area mAU*s | Height [mAU] | Area %  |
|--------|------------|------|-------------|------------|--------------|---------|
| 1      | 4.224      | BB   | 0.3276      | 73.76086   | 2.85504      | 0.2774  |
| 2      | 4.733      | BV   | 0.2705      | 102.83092  | 5.12410      | 0.3867  |
| 3      | 5.028      | VV   | 0.1901      | 58.40385   | 4.84774      | 0.2197  |
| 4      | 5.474      | VB   | 0.1940      | 262.21960  | 19.40849     | 0.9862  |
| 5      | 8.166      | VV   | 0.2610      | 131.20596  | 7.09195      | 0.4935  |
| 6      | 9.930      | VV   | 0.4271      | 82.55071   | 2.56028      | 0.3105  |
| 7      | 11.900     | VV   | 0.2725      | 1.92784e4  | 1049.63708   | 72.5043 |
| 8      | 13.598     | MF   | 0.3579      | 2819.97900 | 131.30621    | 10.6057 |
| 9      | 13.874     | FM   | 0.2050      | 481.62720  | 39.16420     | 1.8114  |
| 10     | 14.961     | VB   | 0.3140      | 2370.58252 | 111.29093    | 8.9155  |
| 11     | 17.725     | BB   | 0.3957      | 927.76965  | 34.93492     | 3.4893  |

**(2R,3S)-5-((tert-butyldimethylsilyl)oxy)-1-(2-ethyl-1H-pyrrol-1-yl)-2,3-dihydroxy-4,4-dimethylpentan-1-one (3l):**

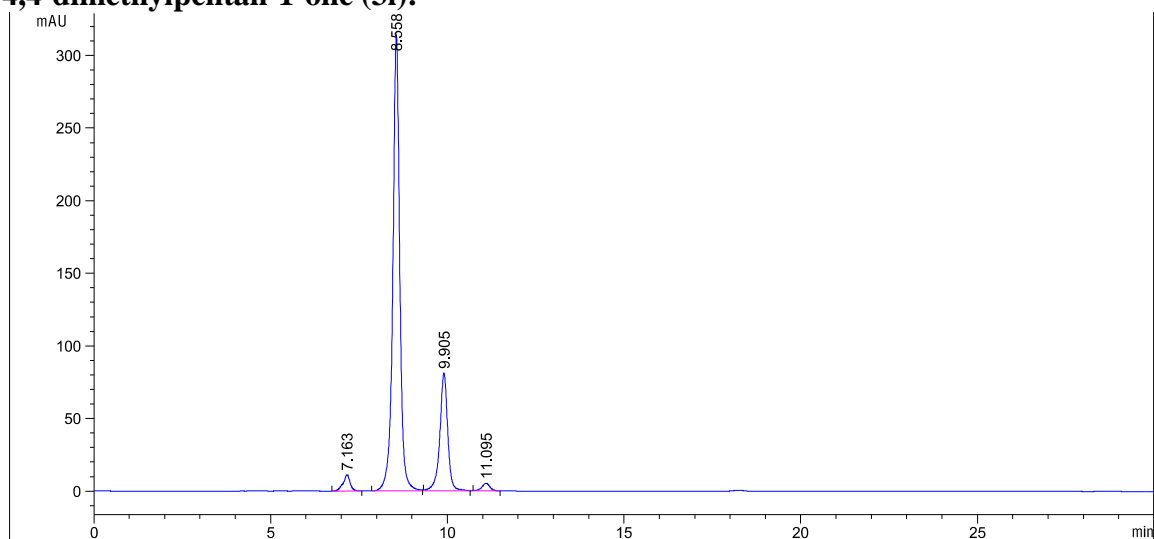

| Peak # | Time [min] | Type | Width [min] | Area mAU   | Height [mAU] | Area %  |
|--------|------------|------|-------------|------------|--------------|---------|
| 1      | 7.163      | BB   | 0.1979      | 155.64168  | 11.24250     | 2.6801  |
| 2      | 8.558      | BB   | 0.2037      | 4298.59814 | 313.36346    | 74.0202 |
| 3      | 9.905      | BB   | 0.2335      | 1269.55762 | 81.12251     | 21.8613 |
| 4      | 11.095     | BB   | 0.2331      | 83.53390   | 5.35122      | 1.4384  |

**(2R,3S)-1-(2-ethyl-1H-pyrrol-1-yl)-2,3-dihydroxy-3-phenylpropan-1-one (3m):**

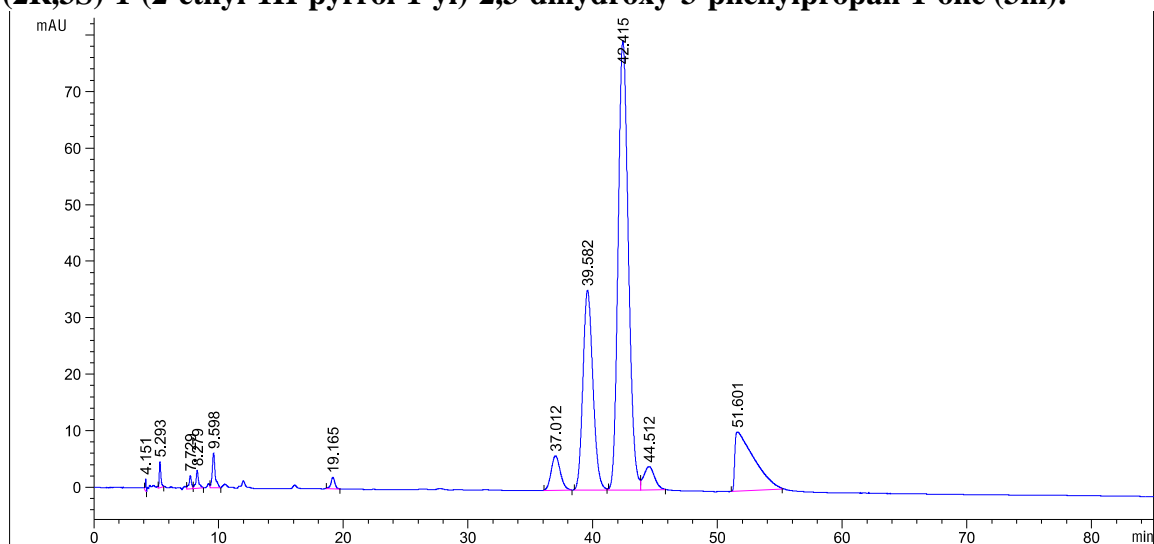

| Peak # | RetTime [min] | Type | Width [min] | Area mAU *s | Height [mAU] | Area %  |
|--------|---------------|------|-------------|-------------|--------------|---------|
| 1      | 4.151         | BV   | 0.0746      | 9.84968     | 2.06284      | 0.1161  |
| 2      | 5.293         | VB   | 0.1351      | 42.37485    | 4.66566      | 0.4995  |
| 3      | 7.729         | VV   | 0.1989      | 32.13319    | 2.28680      | 0.3788  |
| 4      | 8.279         | VB   | 0.2140      | 47.19418    | 3.12528      | 0.5563  |
| 5      | 9.598         | VB   | 0.2351      | 98.83949    | 6.11808      | 1.1651  |
| 6      | 19.165        | BB   | 0.3452      | 46.47079    | 2.03400      | 0.5478  |
| 7      | 37.012        | BB   | 0.7809      | 312.35718   | 6.11461      | 3.6820  |
| 8      | 39.582        | BB   | 0.8639      | 1969.80493  | 35.36532     | 23.2194 |
| 9      | 42.415        | BV   | 0.8909      | 4545.24316  | 79.54462     | 53.5777 |
| 10     | 44.512        | VB   | 0.8978      | 251.19789   | 4.12801      | 2.9610  |
| 11     | 51.601        | BB   | 1.3574      | 1127.99268  | 10.51877     | 13.2964 |



**(2R,3S)-3-(4-chlorophenyl)-1-(2-ethyl-1H-pyrrol-1-yl)-2,3-dihydroxypropan-1-one  
(3n):**

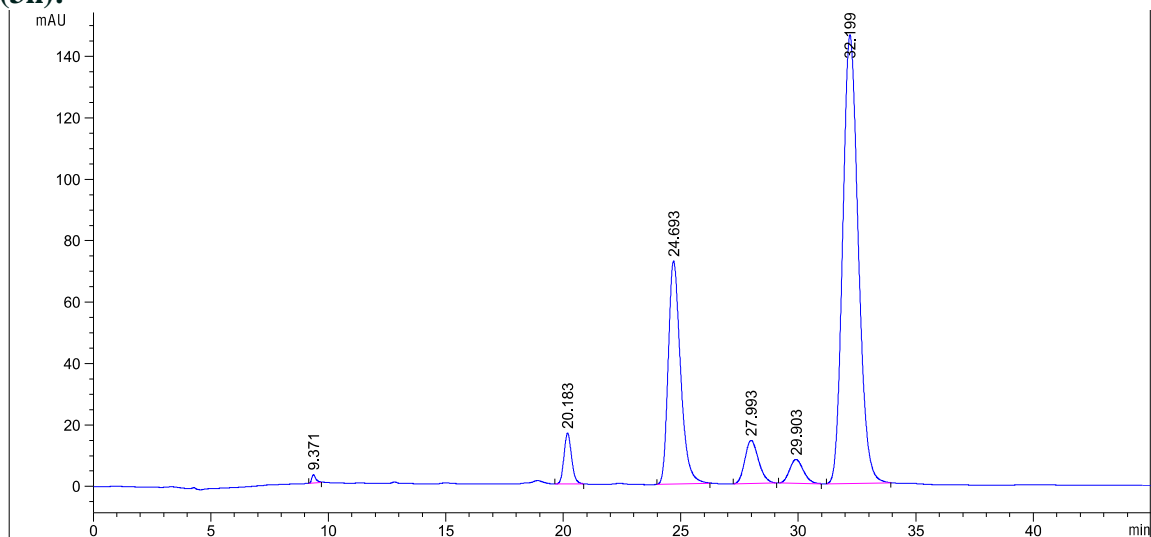

| Peak # | Retention Time [min] | Type | Width [min] | Area mAU *s | Height [mAU] | Area %  |
|--------|----------------------|------|-------------|-------------|--------------|---------|
| 1      | 9.371                | BB   | 0.1808      | 32.89509    | 2.71235      | 0.3083  |
| 2      | 20.183               | VB   | 0.3453      | 370.69180   | 16.57926     | 3.4743  |
| 3      | 24.693               | BB   | 0.5575      | 2645.32031  | 72.60931     | 24.7935 |
| 4      | 27.993               | BB   | 0.6253      | 572.14655   | 14.08710     | 5.3625  |
| 5      | 29.903               | BB   | 0.6333      | 319.52985   | 7.78387      | 2.9948  |
| 6      | 32.199               | BB   | 0.7167      | 6728.83447  | 146.02054    | 63.0666 |

**(2R,3S,E)-1-(2-ethyl-1H-pyrrol-1-yl)-2,3-dihydroxy-5-phenylpent-4-en-1-one (3o):**

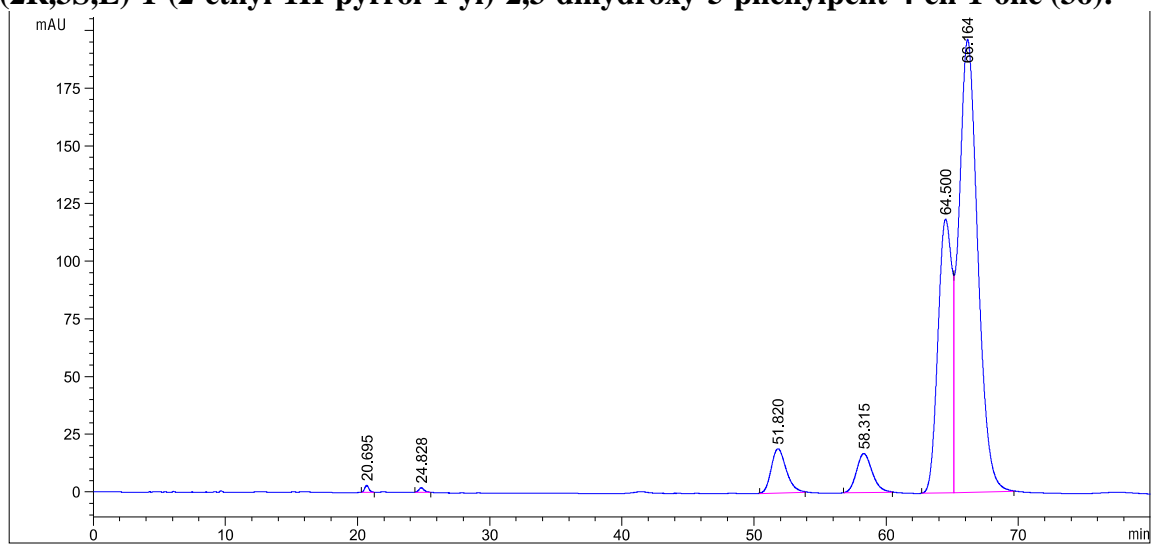

| Peak # | Time [min] | Type | Width [min] | Area mAU   | Area *s | Height [mAU] | Area %  |
|--------|------------|------|-------------|------------|---------|--------------|---------|
| 1      | 20.695     | BB   | 0.3445      | 66.93222   |         | 2.98639      | 0.2128  |
| 2      | 24.828     | BB   | 0.4333      | 54.87017   |         | 1.95775      | 0.1745  |
| 3      | 51.820     | BB   | 1.1708      | 1502.99292 |         | 19.14305     | 4.7792  |
| 4      | 58.315     | BB   | 1.2412      | 1398.14746 |         | 16.93659     | 4.4458  |
| 5      | 64.500     | BV   | 1.1295      | 8814.61523 |         | 118.56046    | 28.0285 |
| 6      | 66.164     | VB   | 1.4993      | 1.96112e4  |         | 196.24577    | 62.3592 |

**(2R,3S)-5,5-diethoxy-1-(2-ethyl-1H-pyrrol-1-yl)-2,3-dihydropentan-1-one (3p):**

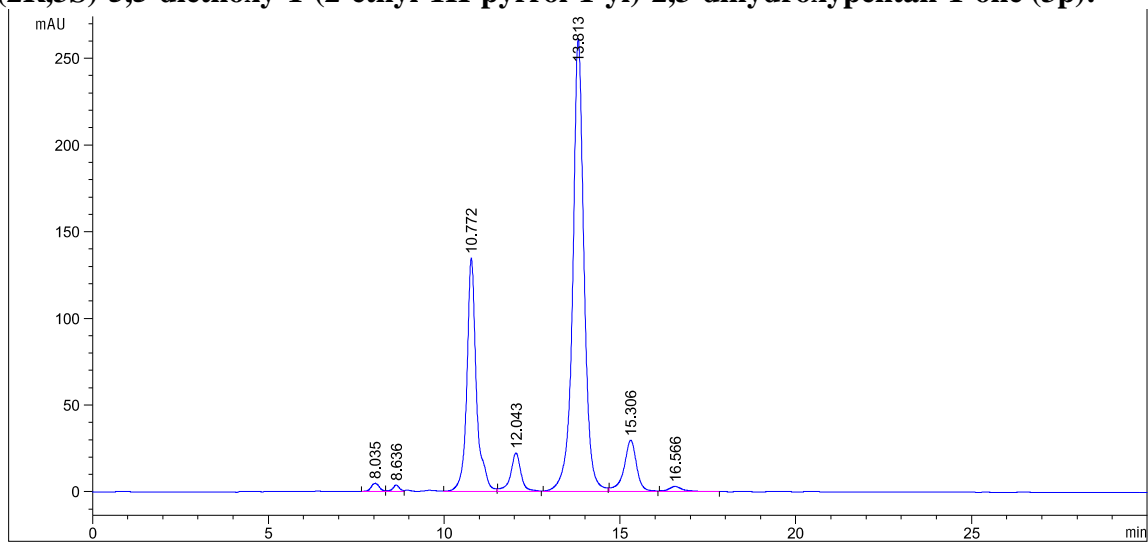

| Peak # | Retention Time [min] | Type | Width [min] | Area mAU   | Area %  | Height [mAU] |
|--------|----------------------|------|-------------|------------|---------|--------------|
| 1      | 8.035                | BV   | 0.2595      | 78.17309   | 0.7945  | 4.70113      |
| 2      | 8.636                | VV   | 0.2010      | 51.98550   | 0.5283  | 3.78526      |
| 3      | 10.772               | VB   | 0.2772      | 2543.34668 | 25.8477 | 134.62369    |
| 4      | 12.043               | BB   | 0.3050      | 463.34738  | 4.7089  | 22.30186     |
| 5      | 13.813               | BB   | 0.3319      | 5866.29639 | 59.6184 | 261.20474    |
| 6      | 15.306               | BB   | 0.3718      | 746.79132  | 7.5895  | 29.72198     |
| 7      | 16.566               | BB   | 0.4307      | 89.80212   | 0.9126  | 3.02552      |

**(2S,3R)-4-(1,3-dioxolan-2-yl)-1-(2-ethyl-1H-pyrrol-1-yl)-2,3-dihydroxybutan-1-one (3q):**

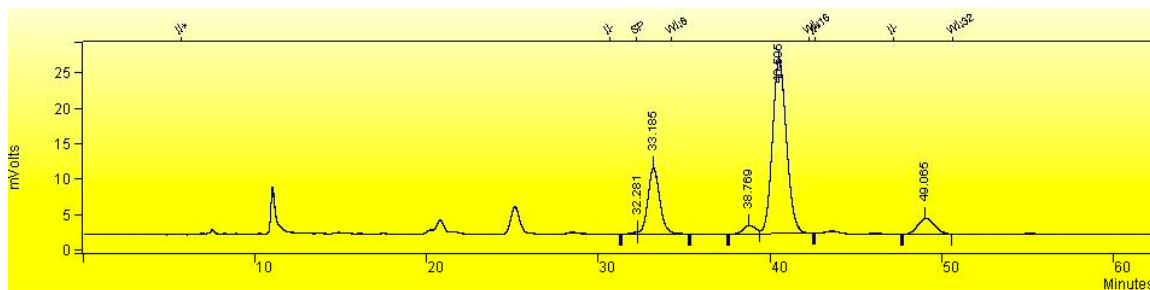

| Peak No. | Peak Name | Result ( ) | Ret. Time (min) | Time Offset (min) | Area (counts) | Sep. Code | Width 1/2 (sec) | Status Codes |
|----------|-----------|------------|-----------------|-------------------|---------------|-----------|-----------------|--------------|
| 1        |           | 0.3509     | 32.281          | 0.000             | 7302          | BV        | 0.0             | U            |
| 2        |           | 21.6157    | 33.185          | 0.000             | 449853        | VB        | 42.8            | U            |
| 3        |           | 2.9933     | 38.769          | 0.000             | 62295         | BV        | 46.8            | U            |
| 4        |           | 67.7206    | 40.505          | 0.000             | 1409362       | VB        | 53.1            | U            |
| 5        |           | 7.3195     | 49.065          | 0.000             | 152329        | BB        | 61.2            | U            |
| Totals:  |           | 100.0000   |                 | 0.000             | 2081141       |           |                 |              |

**(2S,3R)-4-(1,3-dioxan-2-yl)-1-(2-ethyl-1H-pyrrol-1-yl)-2,3-dihydroxybutan-1-one (3r):**

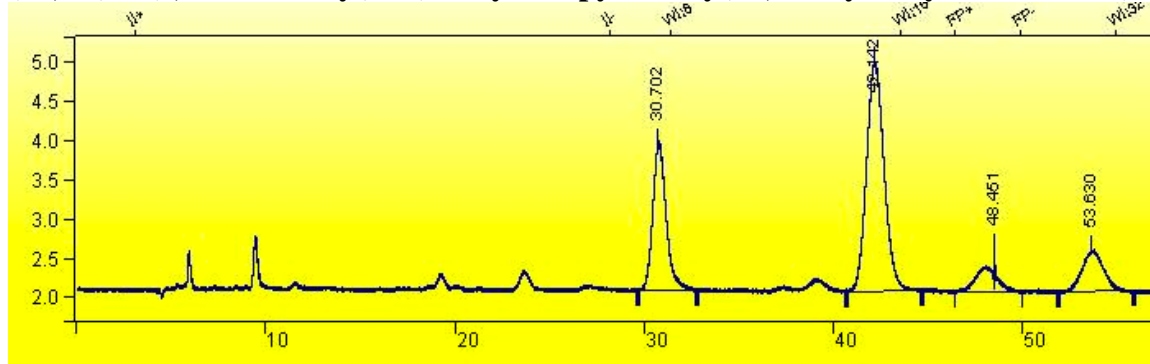

| Peak No. | Peak Name | Result ( ) | Ret. Time (min) | Time Offset (min) | Area (counts) | Sep. Code | Width 1/2 (sec) | Status Codes |
|----------|-----------|------------|-----------------|-------------------|---------------|-----------|-----------------|--------------|
| 1        |           | 26.4705    | 30.702          | 0.000             | 92636         | BB        | 35.4            | U            |
| 2        |           | 54.0458    | 42.142          | 0.000             | 189138        | BB        | 57.8            | U            |
| 3        |           | 7.4938     | 48.451          | 0.000             | 26225         | BB        | 0.1             | U            |
| 4        |           | 11.9899    | 53.630          | 0.000             | 41960         | BB        | 51.3            | U            |
| Totals:  |           | 100.0000   |                 | 0.000             | 349959        |           |                 |              |
